# Supplementary material for: Local adaptation and archaic introgression shape global diversity at human structural variant loci
Source: eLife journal article supplement (doi:10.7554/elife.67615), 2021-09-16
Supplement: supp [file elife_poa_e67615_Figure_4_figure_supplement_5.pdf › elife_poa_e67615_Figure_4_figure_supplement_5.pdf]

AFR

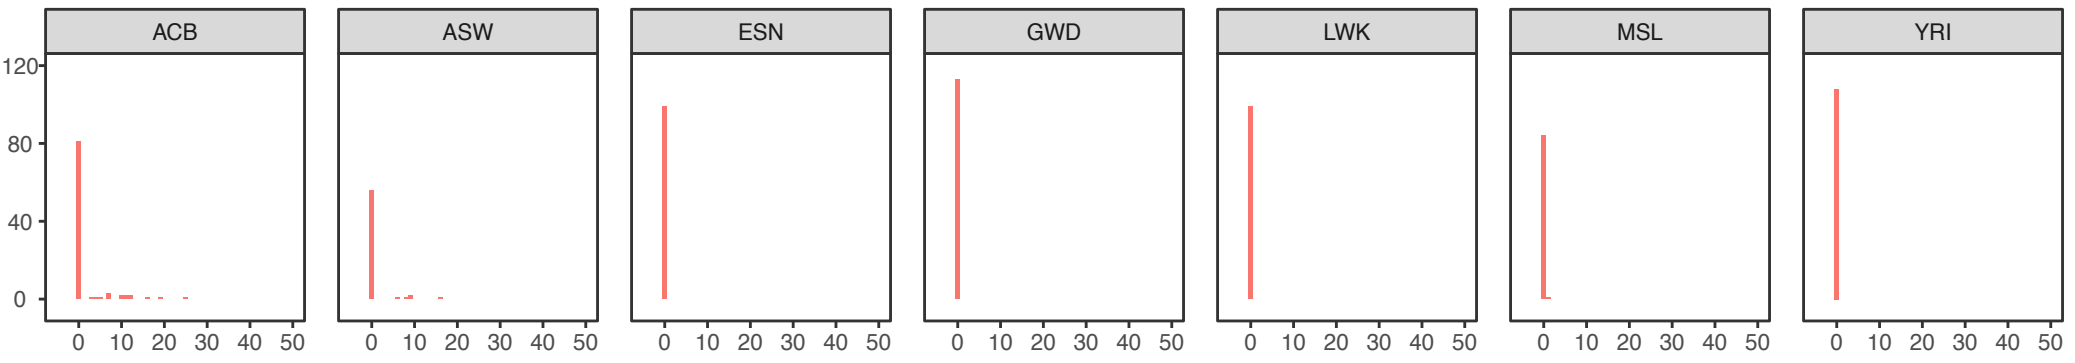

EAS

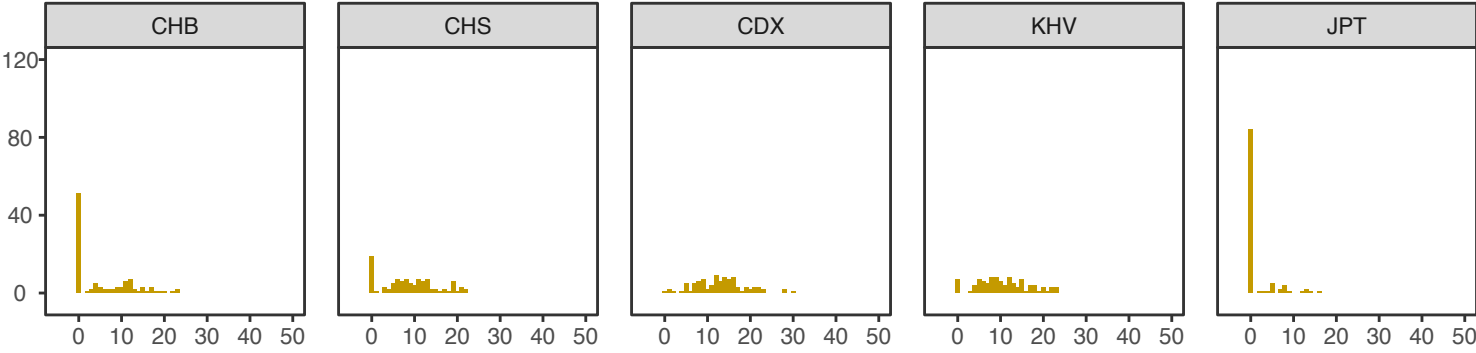

SAS

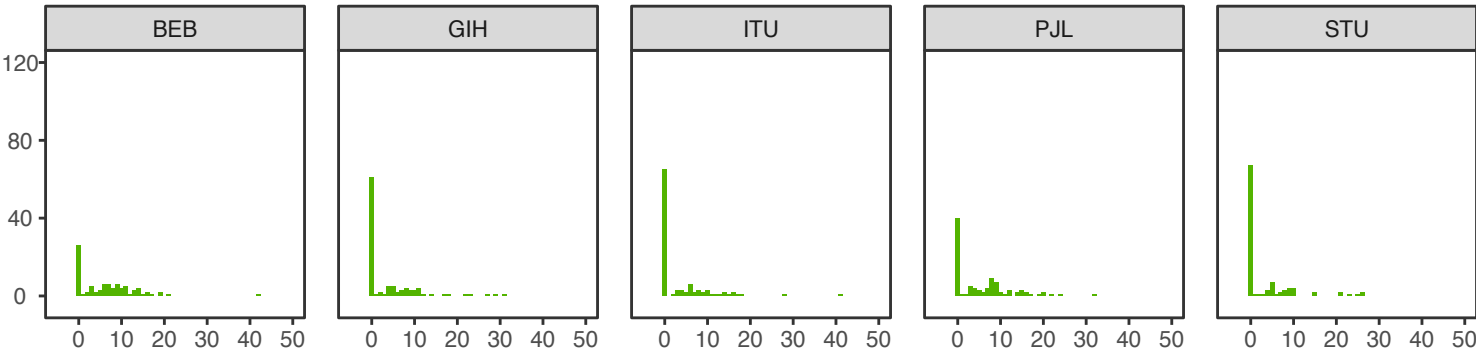

EUR

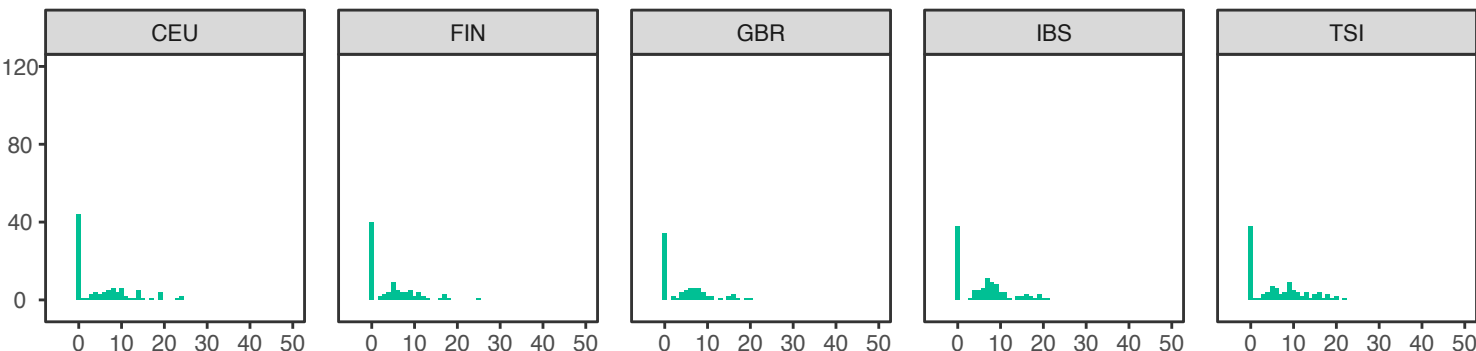

AMR

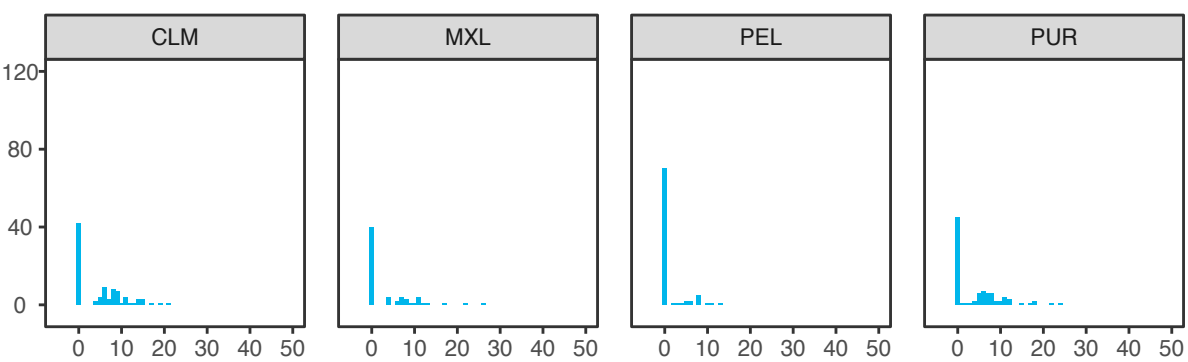

| Archaic hominins        | k-mer count |
|-------------------------|-------------|
| Altai Neanderthal       | 4           |
| Chagyrskaya Neanderthal | 3           |
| Vindija Neanderthal     | 1           |
| Denisovan               | 0           |

k-mer count per sample
