# Supplementary figures and images for: Local adaptation and archaic introgression shape global diversity at human structural variant loci
Source: eLife journal article supplement (doi:10.7554/elife.67615), 2021-09-16

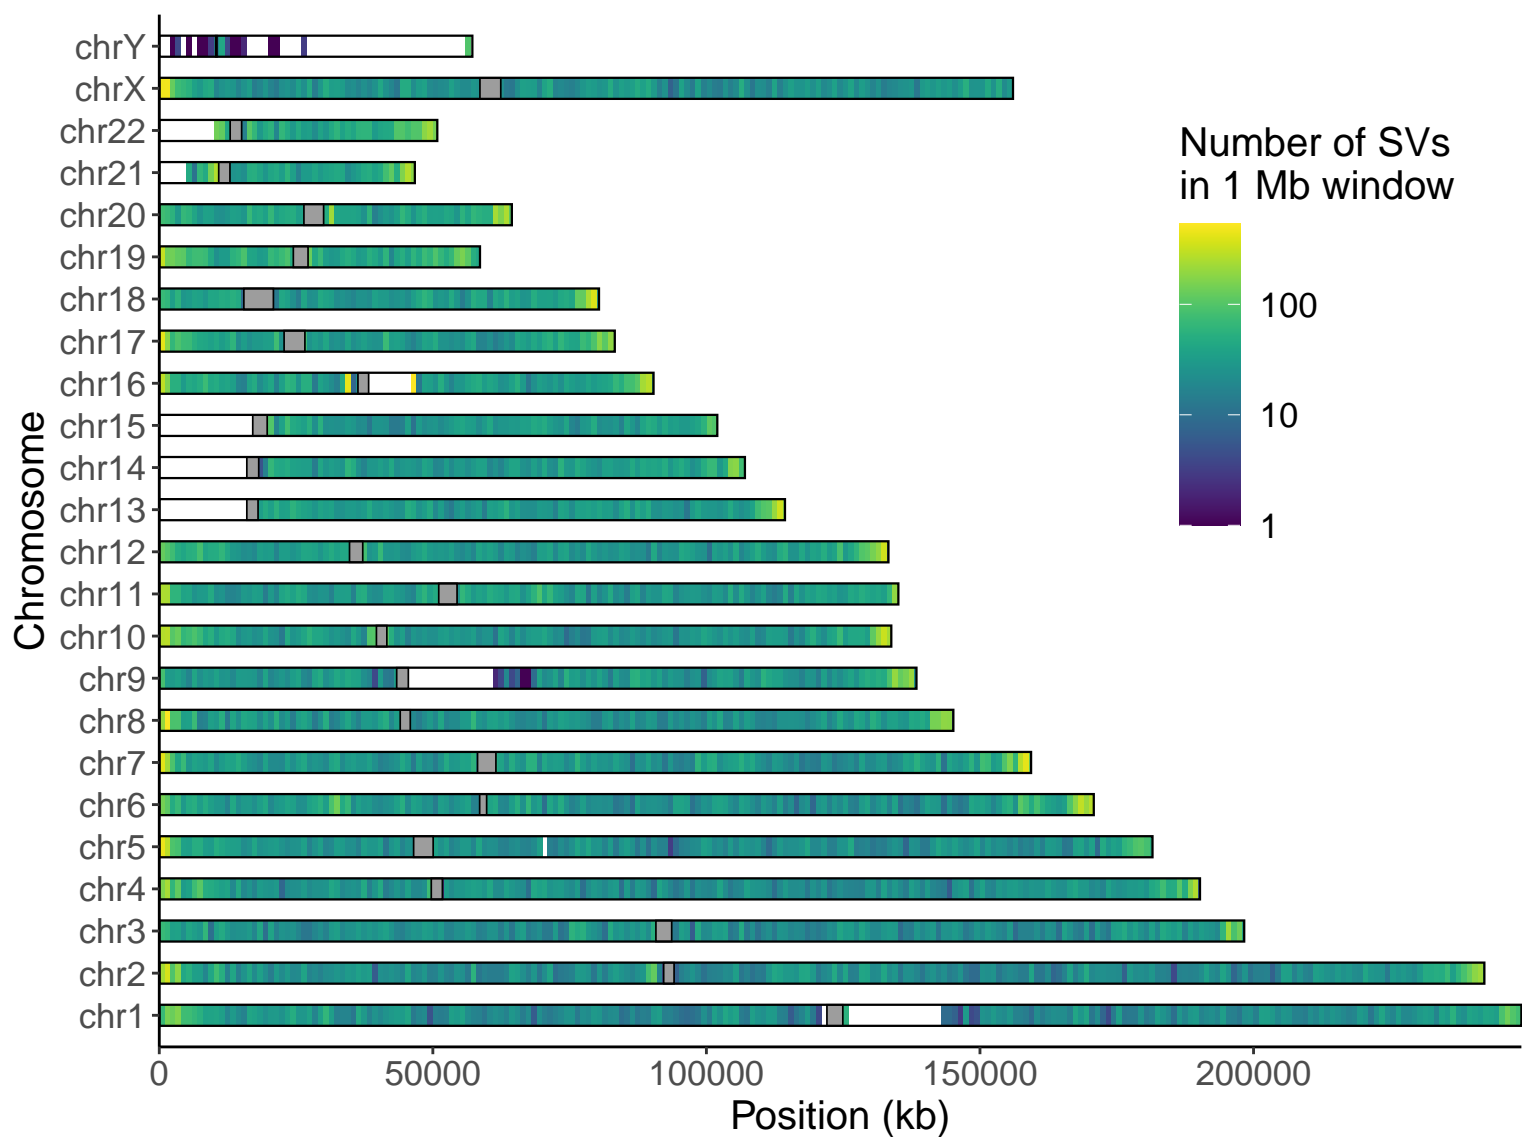

Supplement: supp [file elife_poa_e67615_Figure_1_figure_supplement_1.pdf › elife_poa_e67615_Figure_1_figure_supplement_1.pdf]

## Short-read discovered SVs (1KGP)

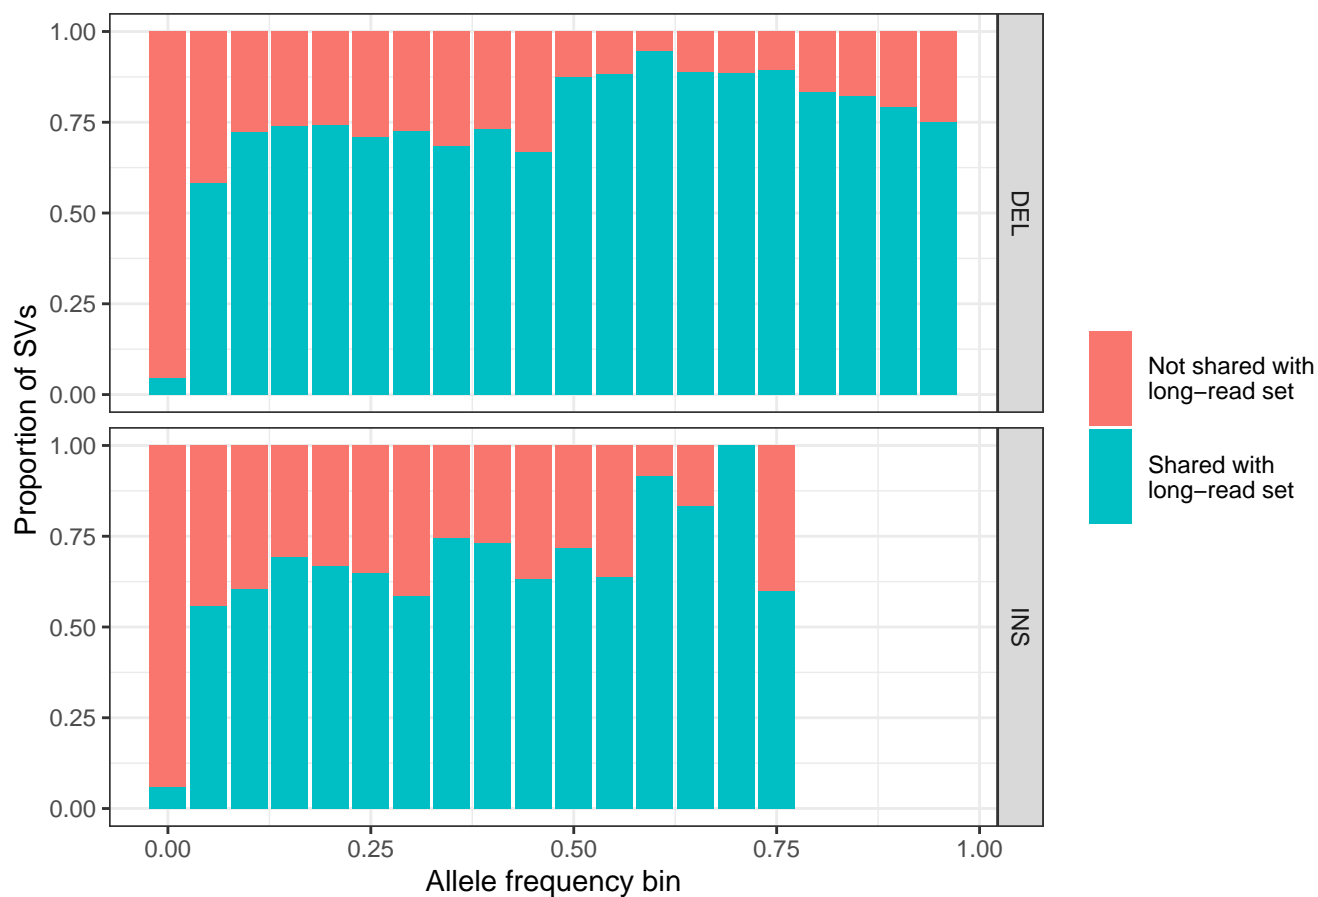

## Long-read discovered SVs

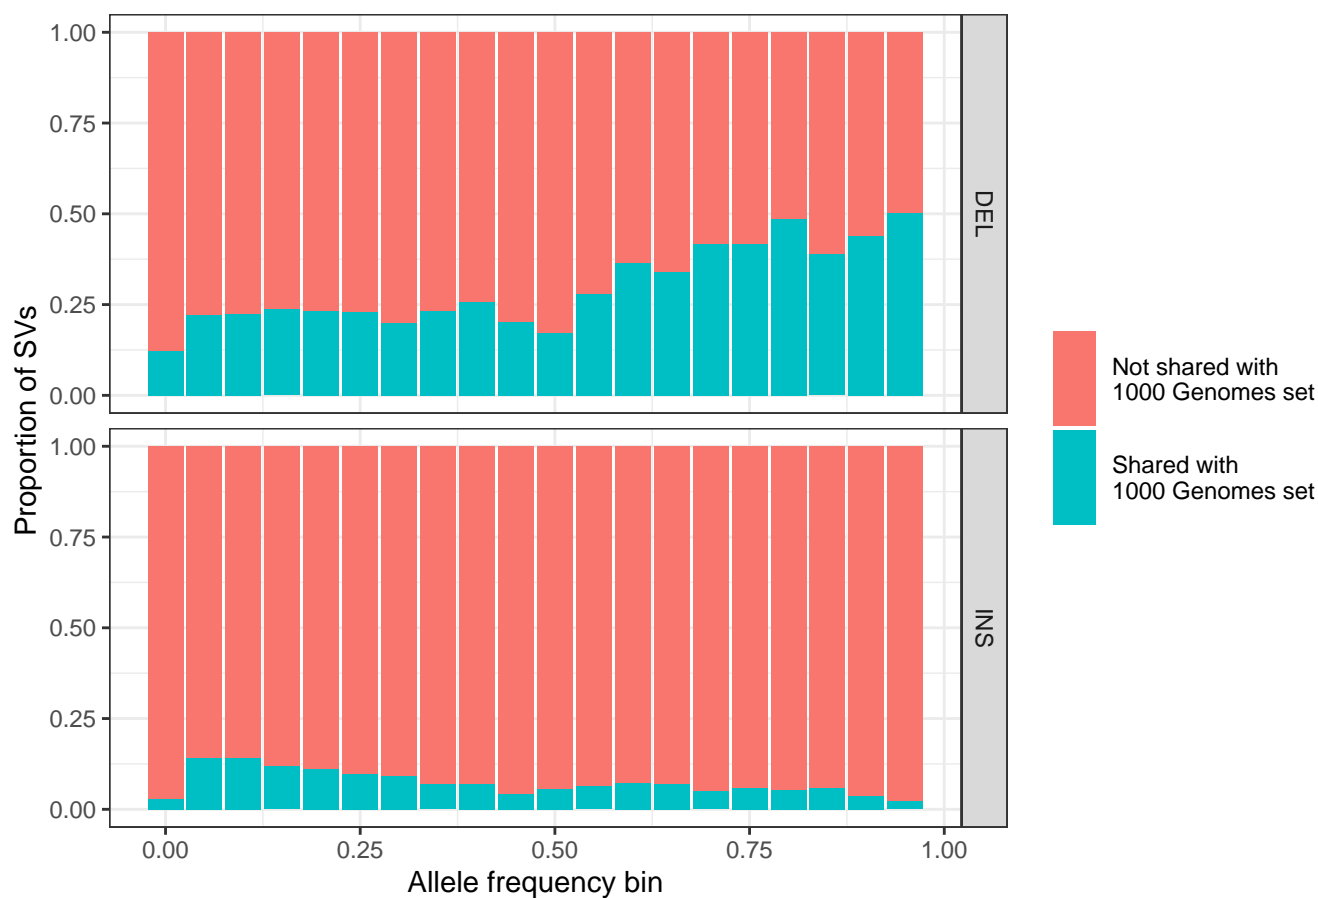

Supplement: supp [file elife_poa_e67615_Figure_1_figure_supplement_2.pdf › elife_poa_e67615_Figure_1_figure_supplement_2.pdf]

# Short-read discovered SVs (HGDP)

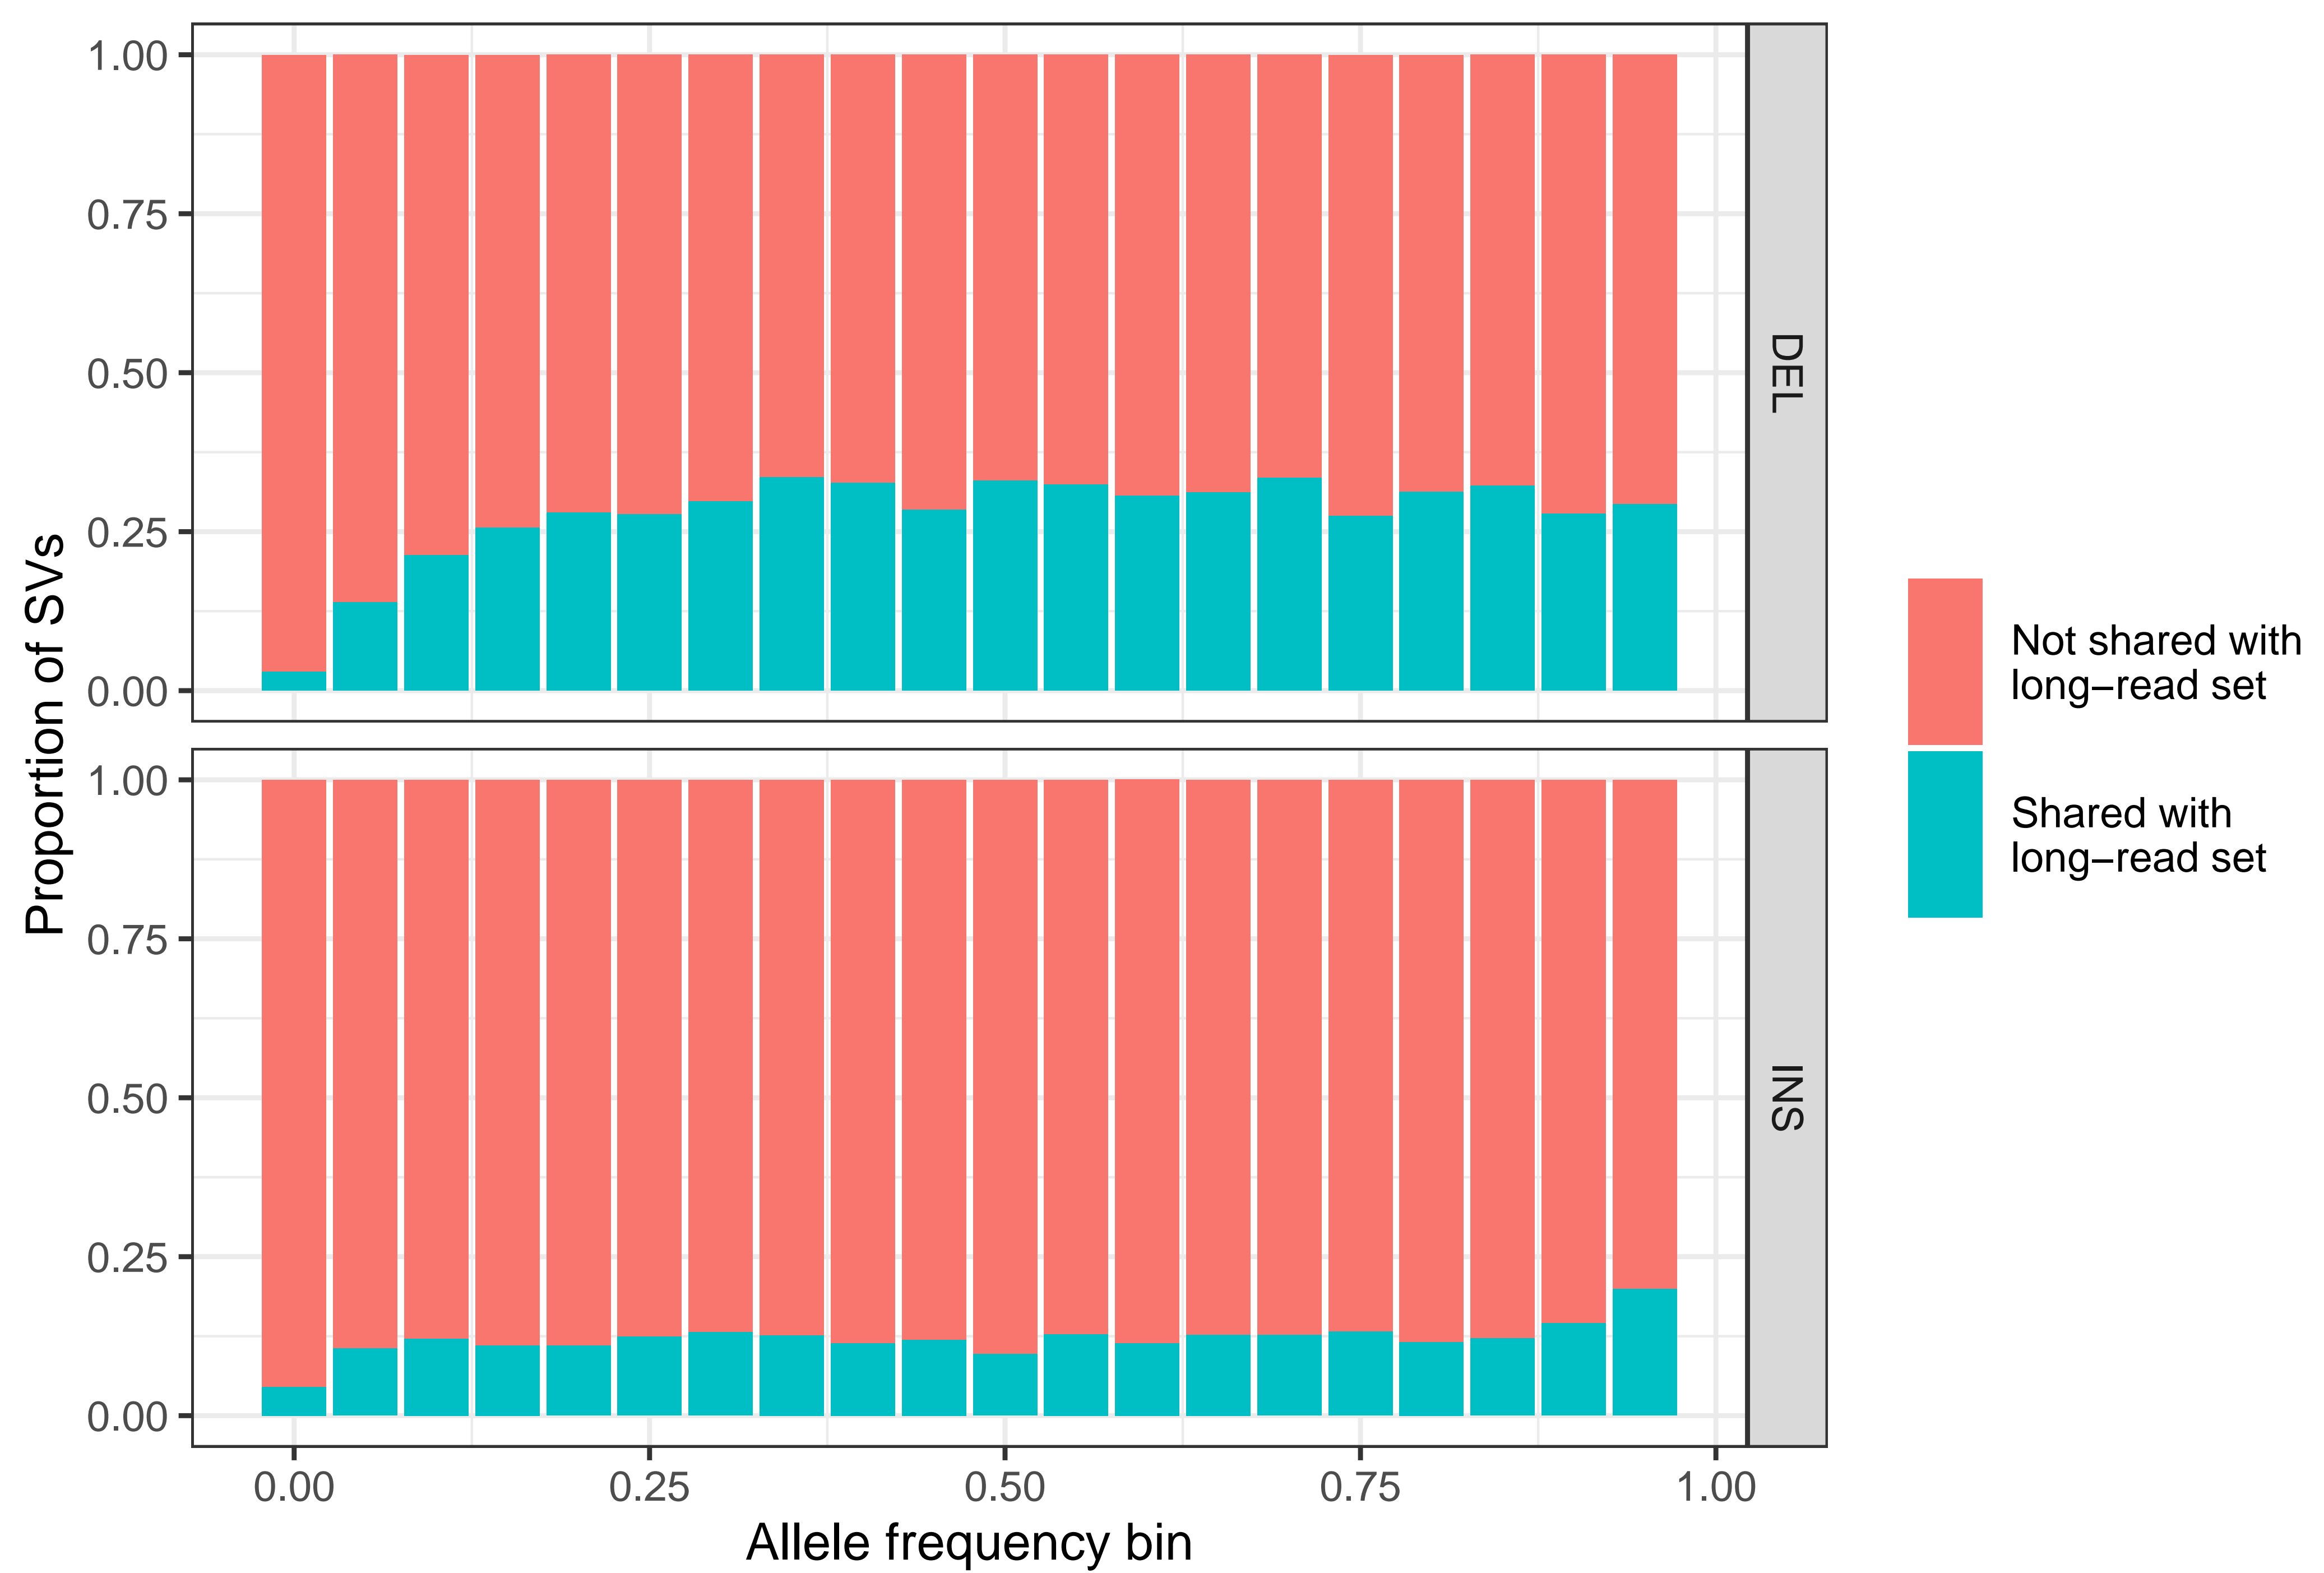

# Long-read discovered SVs

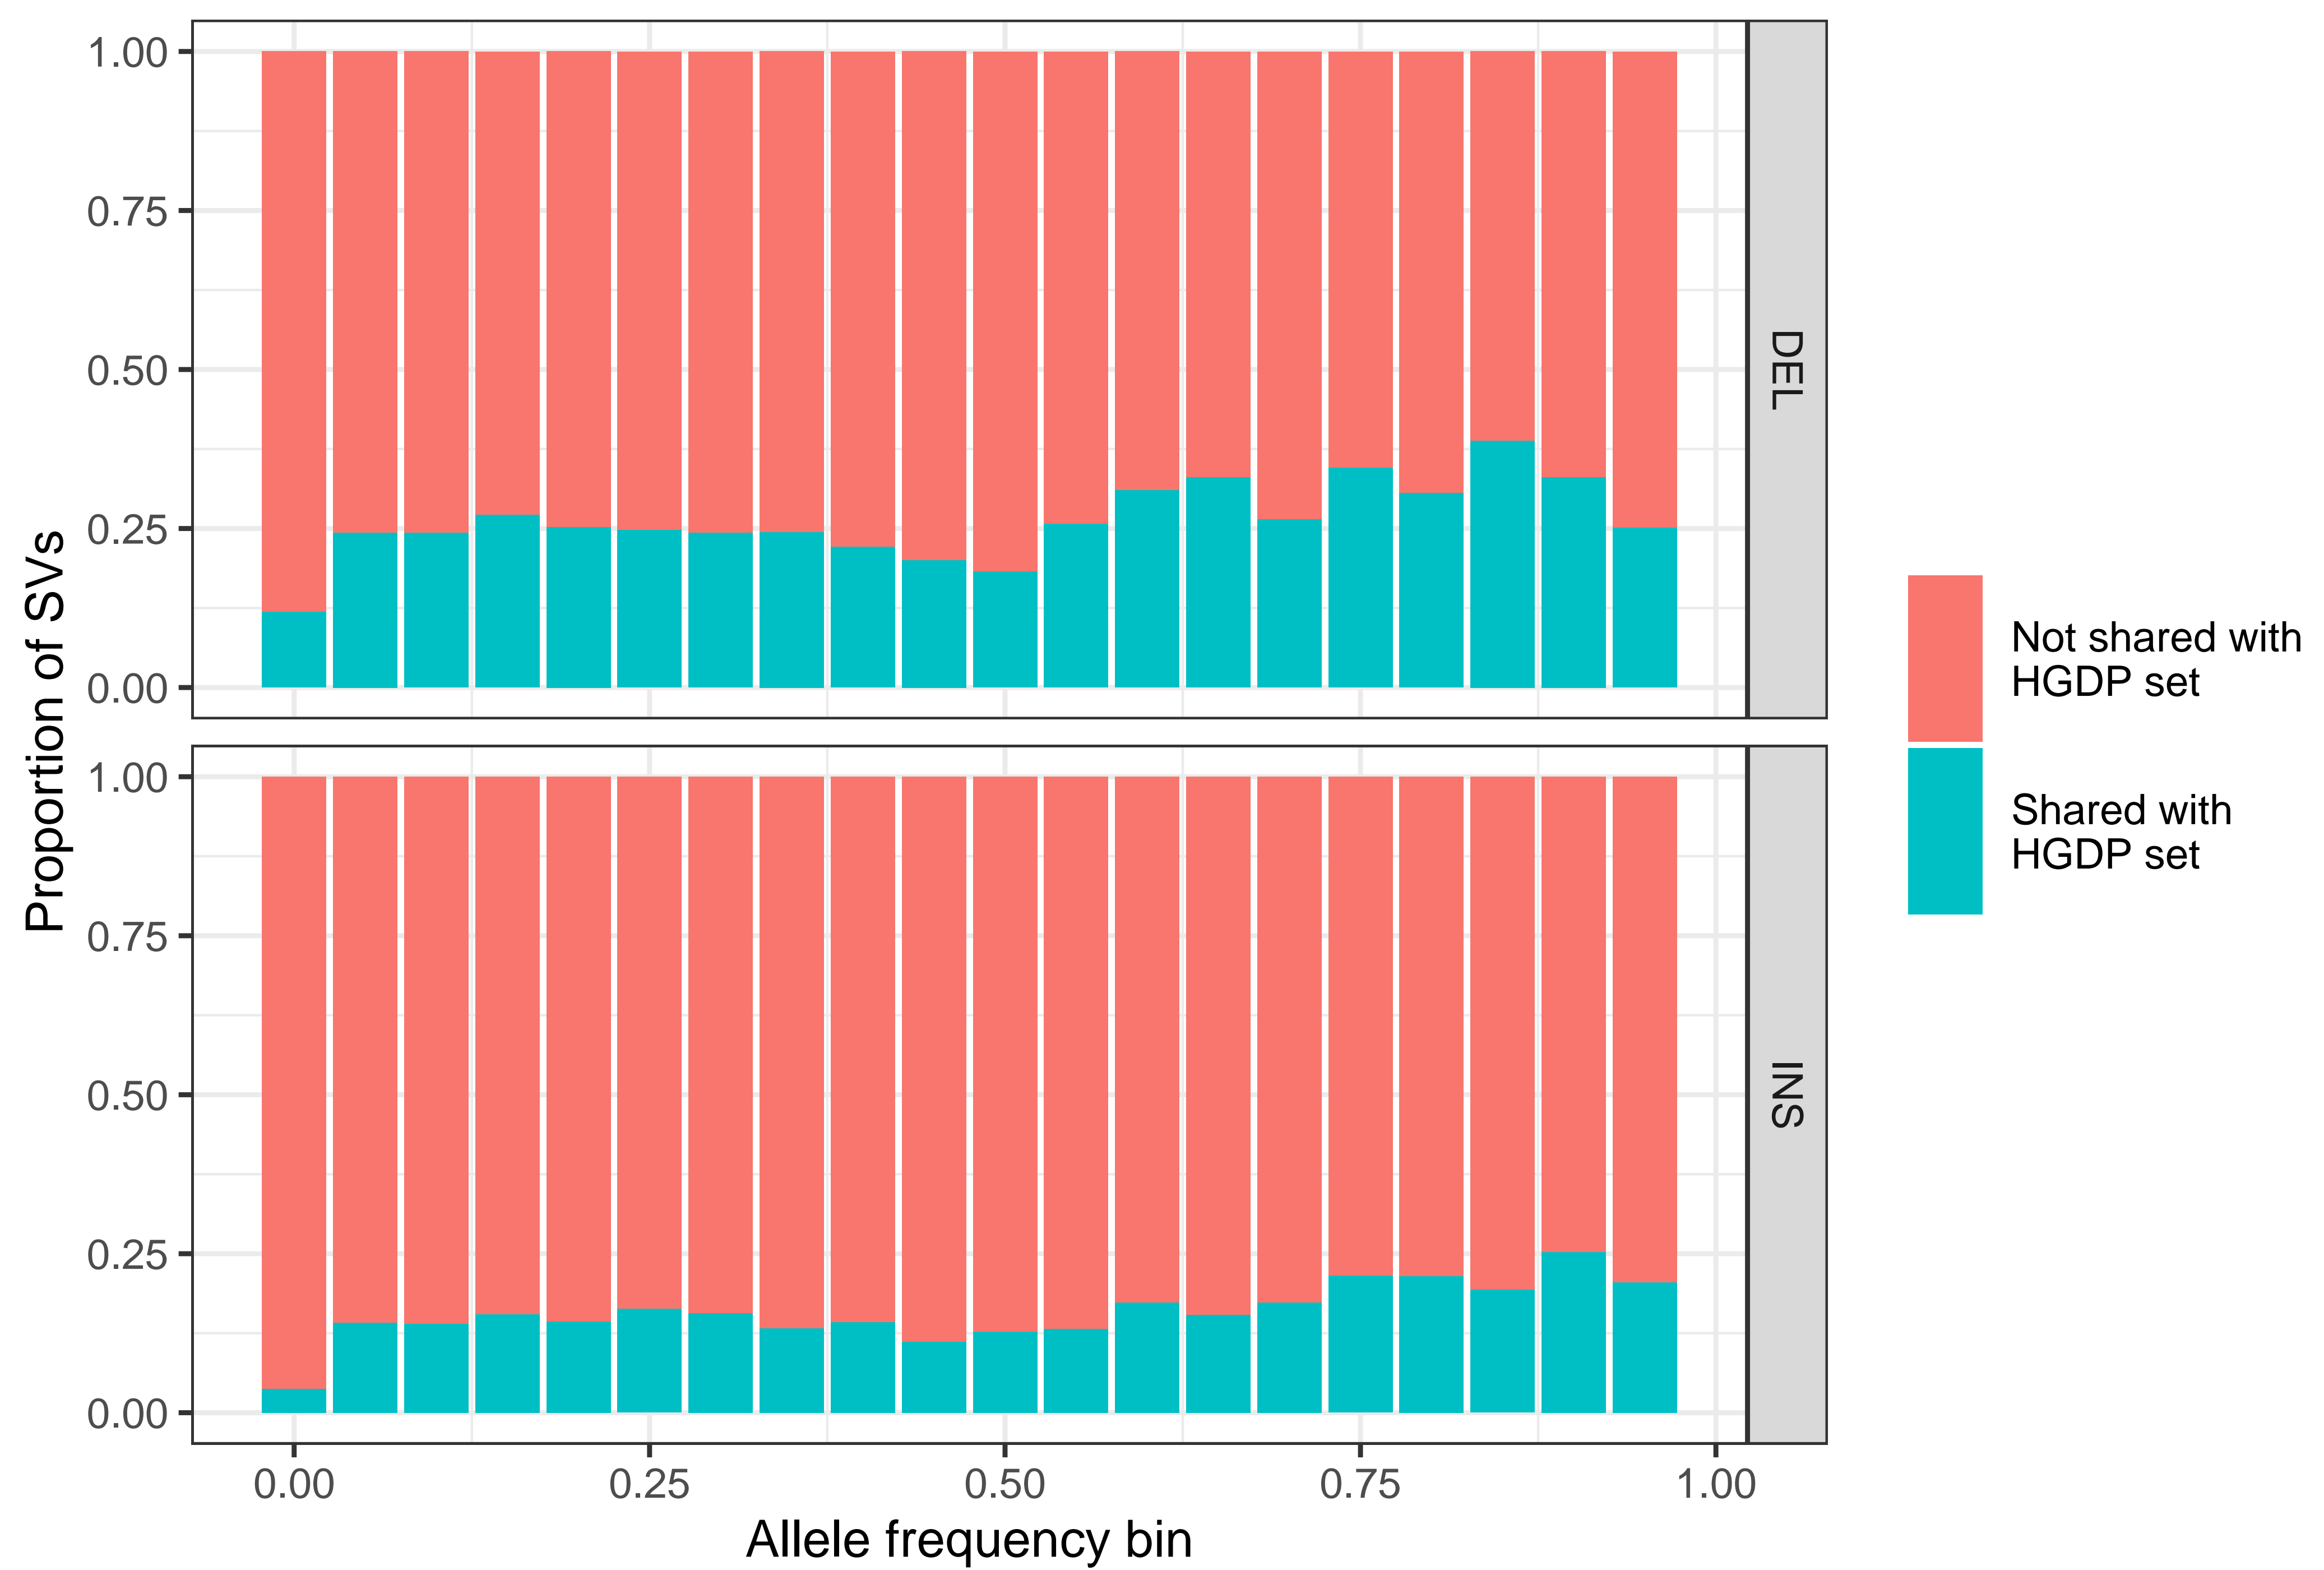

Supplement: supp [file elife_poa_e67615_Figure_1_figure_supplement_3.pdf › elife_poa_e67615_Figure_1_figure_supplement_3.pdf]

Paragraph 1KGP allele frequency

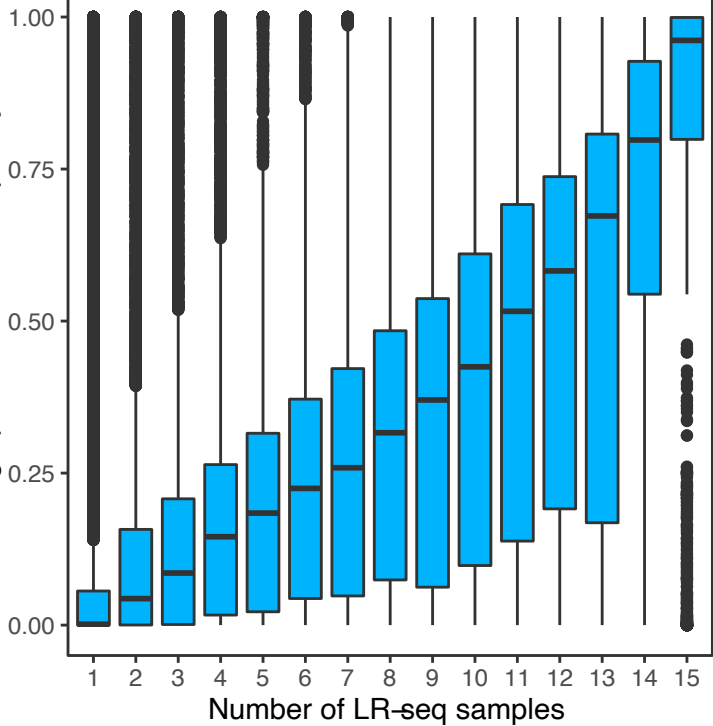

Supplement: supp [file elife_poa_e67615_Figure_1_figure_supplement_4.pdf › elife_poa_e67615_Figure_1_figure_supplement_4.pdf]

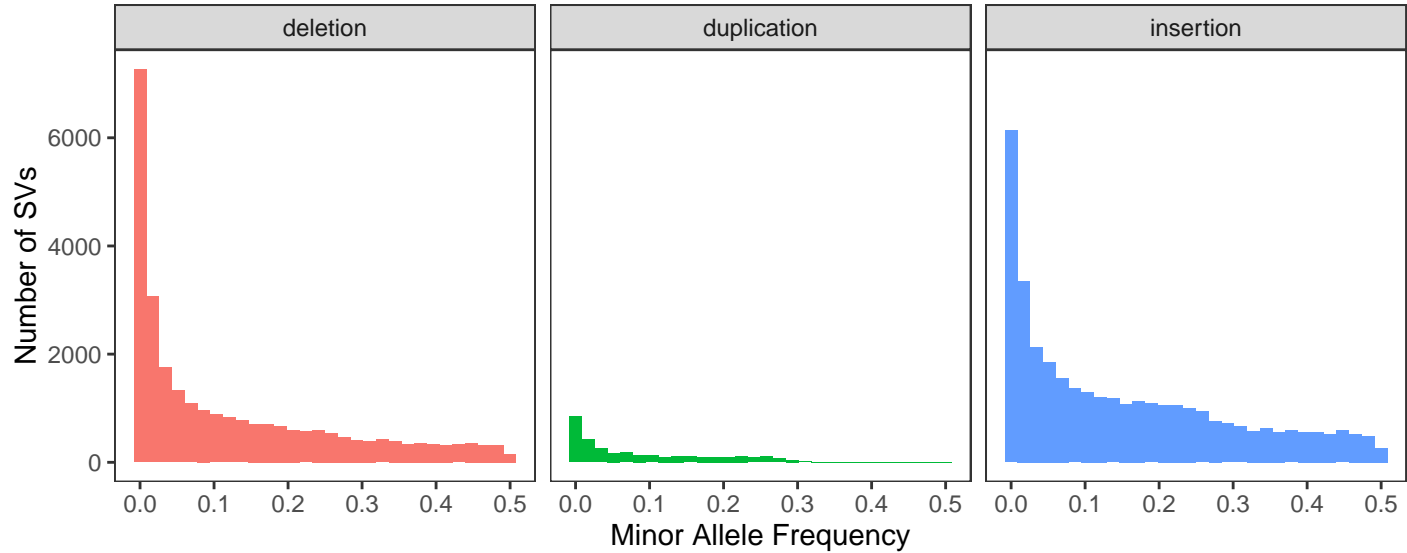

Supplement: supp [file elife_poa_e67615_Figure_1_figure_supplement_5.pdf › elife_poa_e67615_Figure_1_figure_supplement_5.pdf]

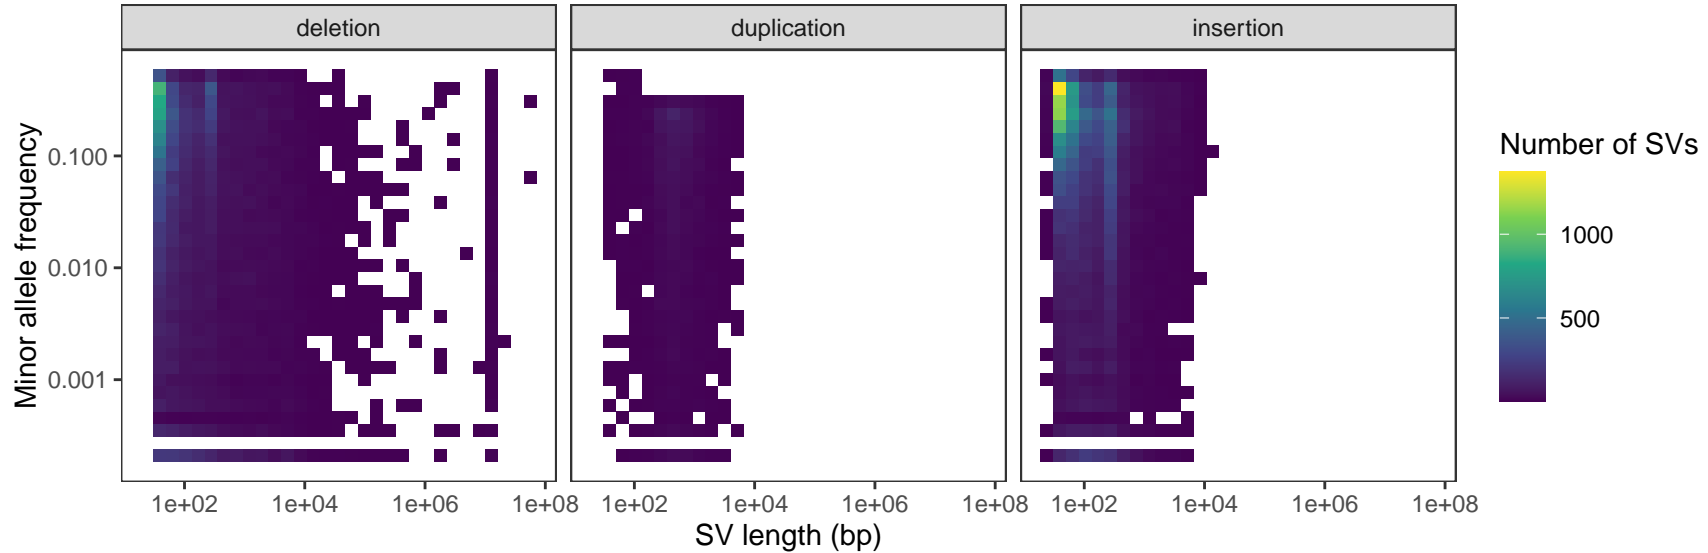

Supplement: supp [file elife_poa_e67615_Figure_1_figure_supplement_6.pdf › elife_poa_e67615_Figure_1_figure_supplement_6.pdf]

# of SVs

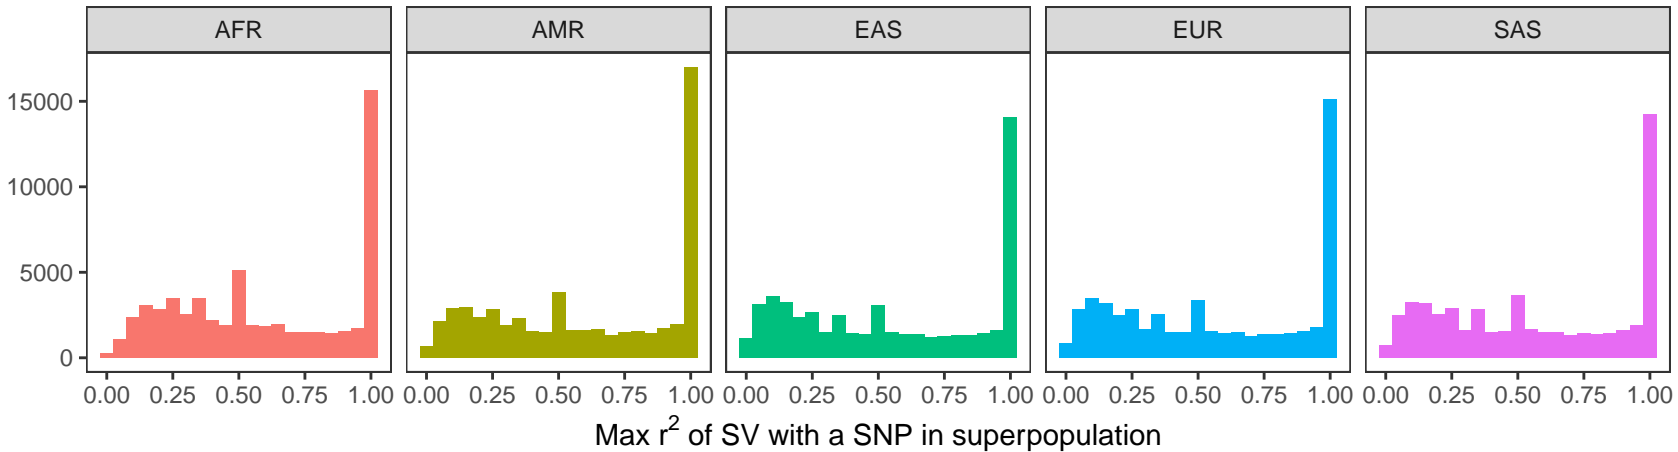

Supplement: supp [file elife_poa_e67615_Figure_1_figure_supplement_7.pdf › elife_poa_e67615_Figure_1_figure_supplement_7.pdf]

**A.**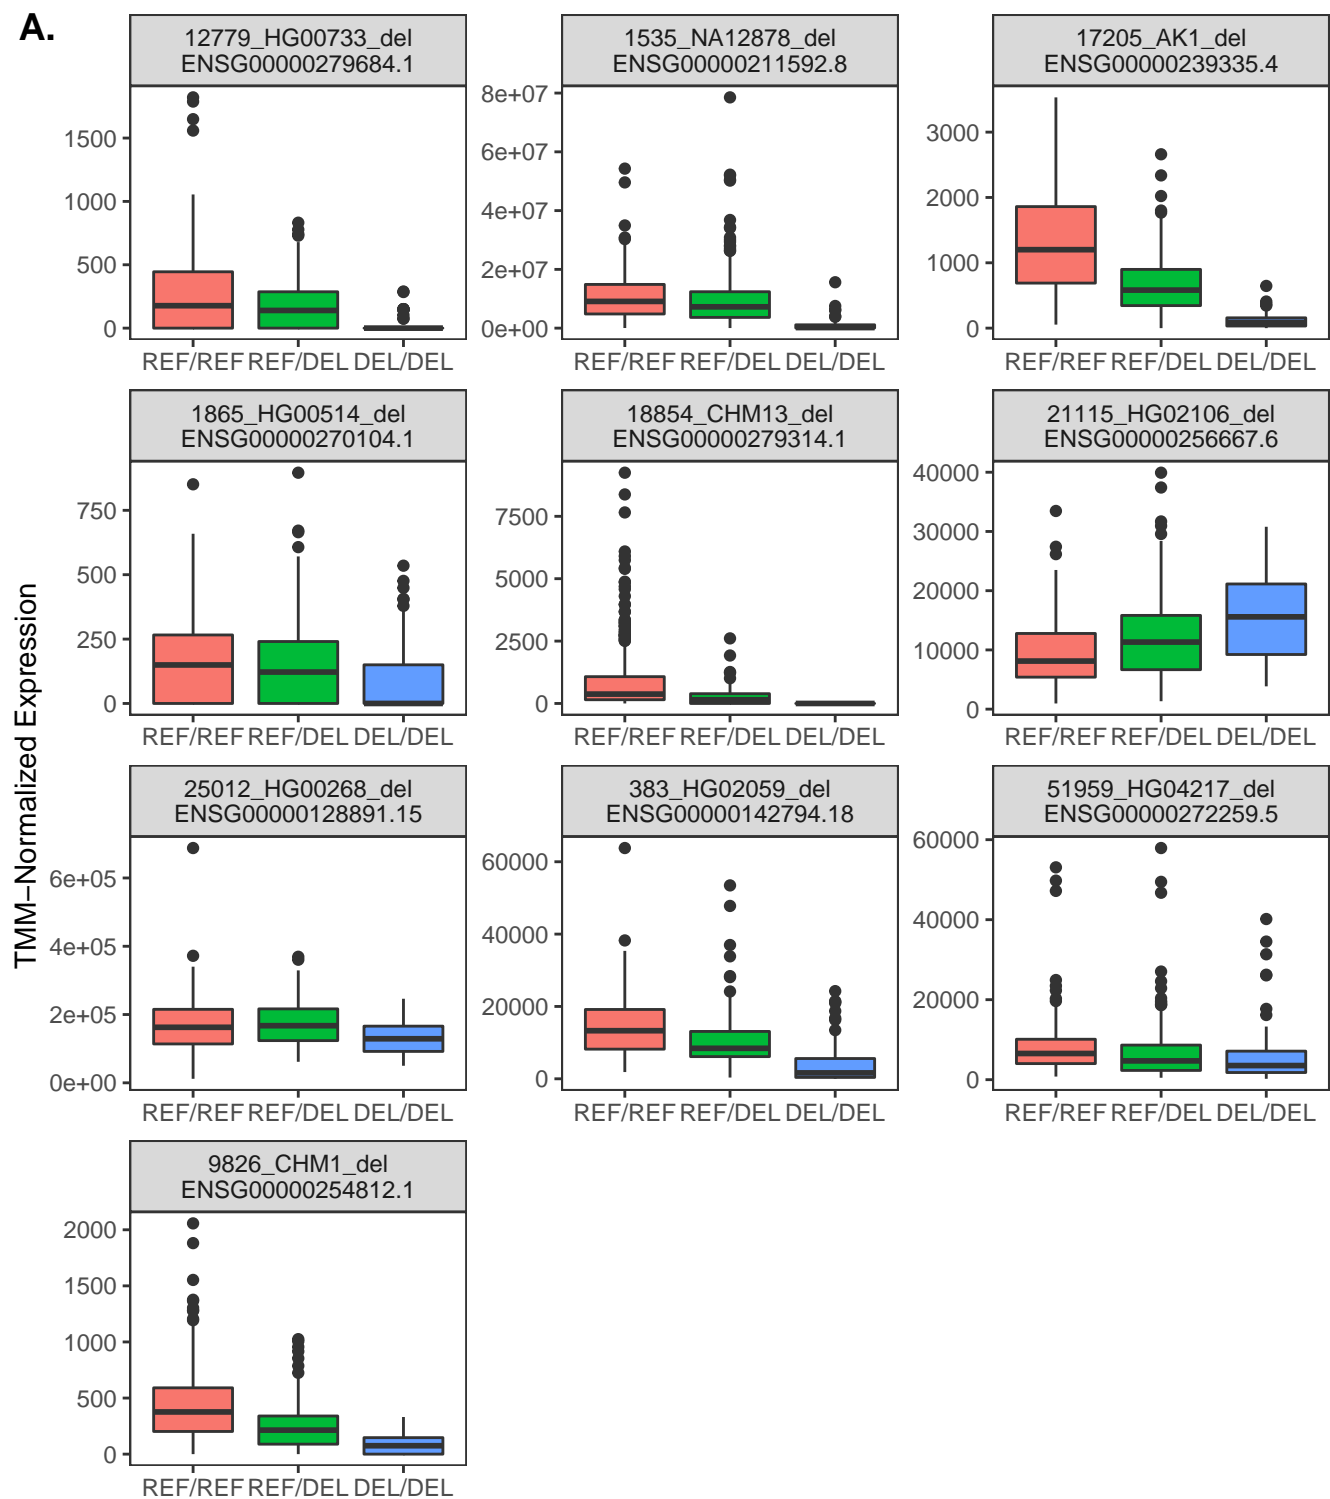**B.**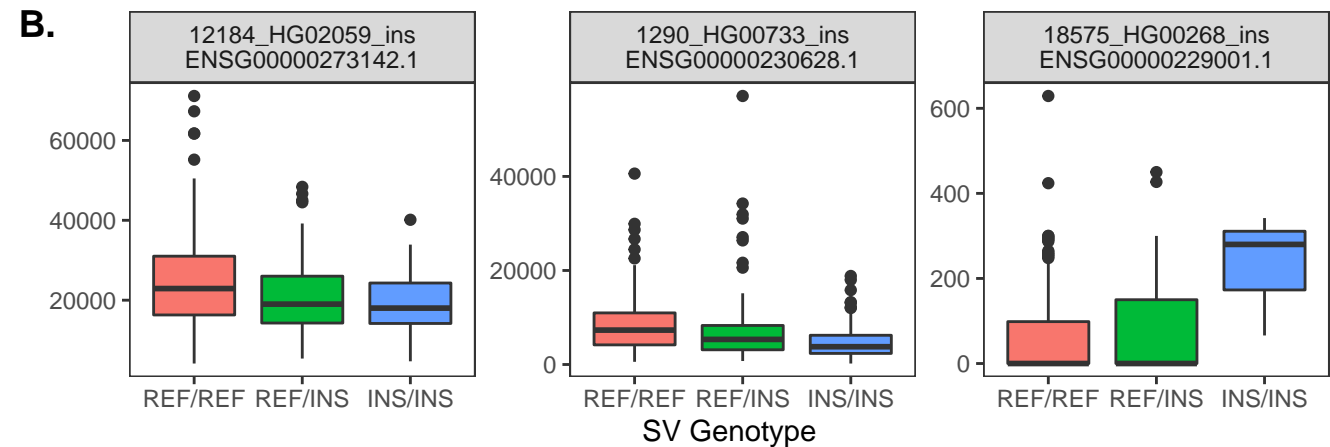

Supplement: supp [file elife_poa_e67615_Figure_2_figure_supplement_1.pdf › elife_poa_e67615_Figure_2_figure_supplement_1.pdf]

Number of fine-mapped eQTLs

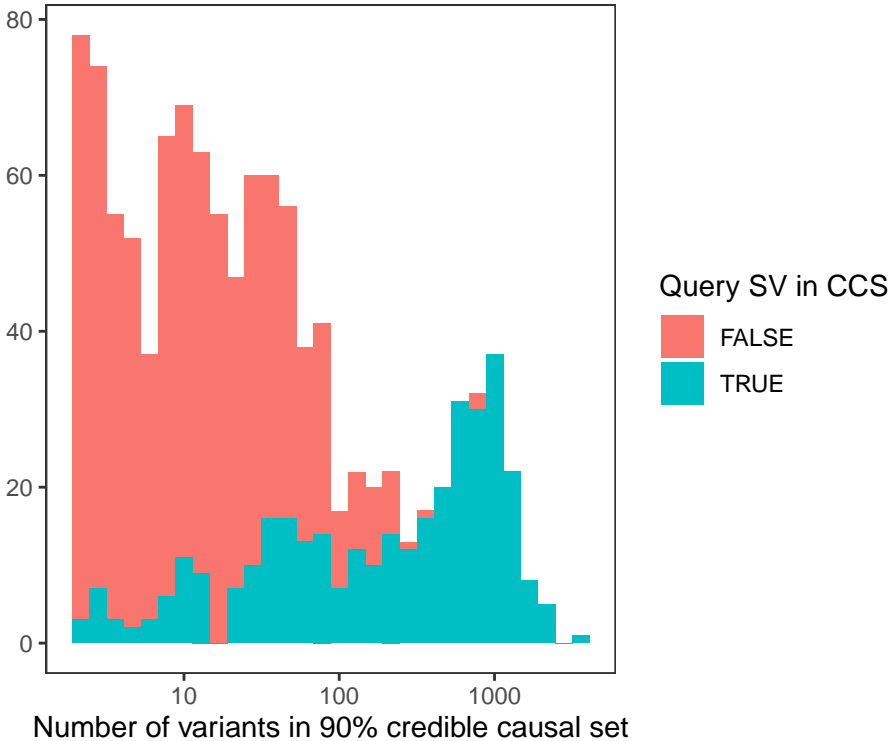

Supplement: supp [file elife_poa_e67615_Figure_2_figure_supplement_2.pdf › elife_poa_e67615_Figure_2_figure_supplement_2.pdf]

$k = 5$

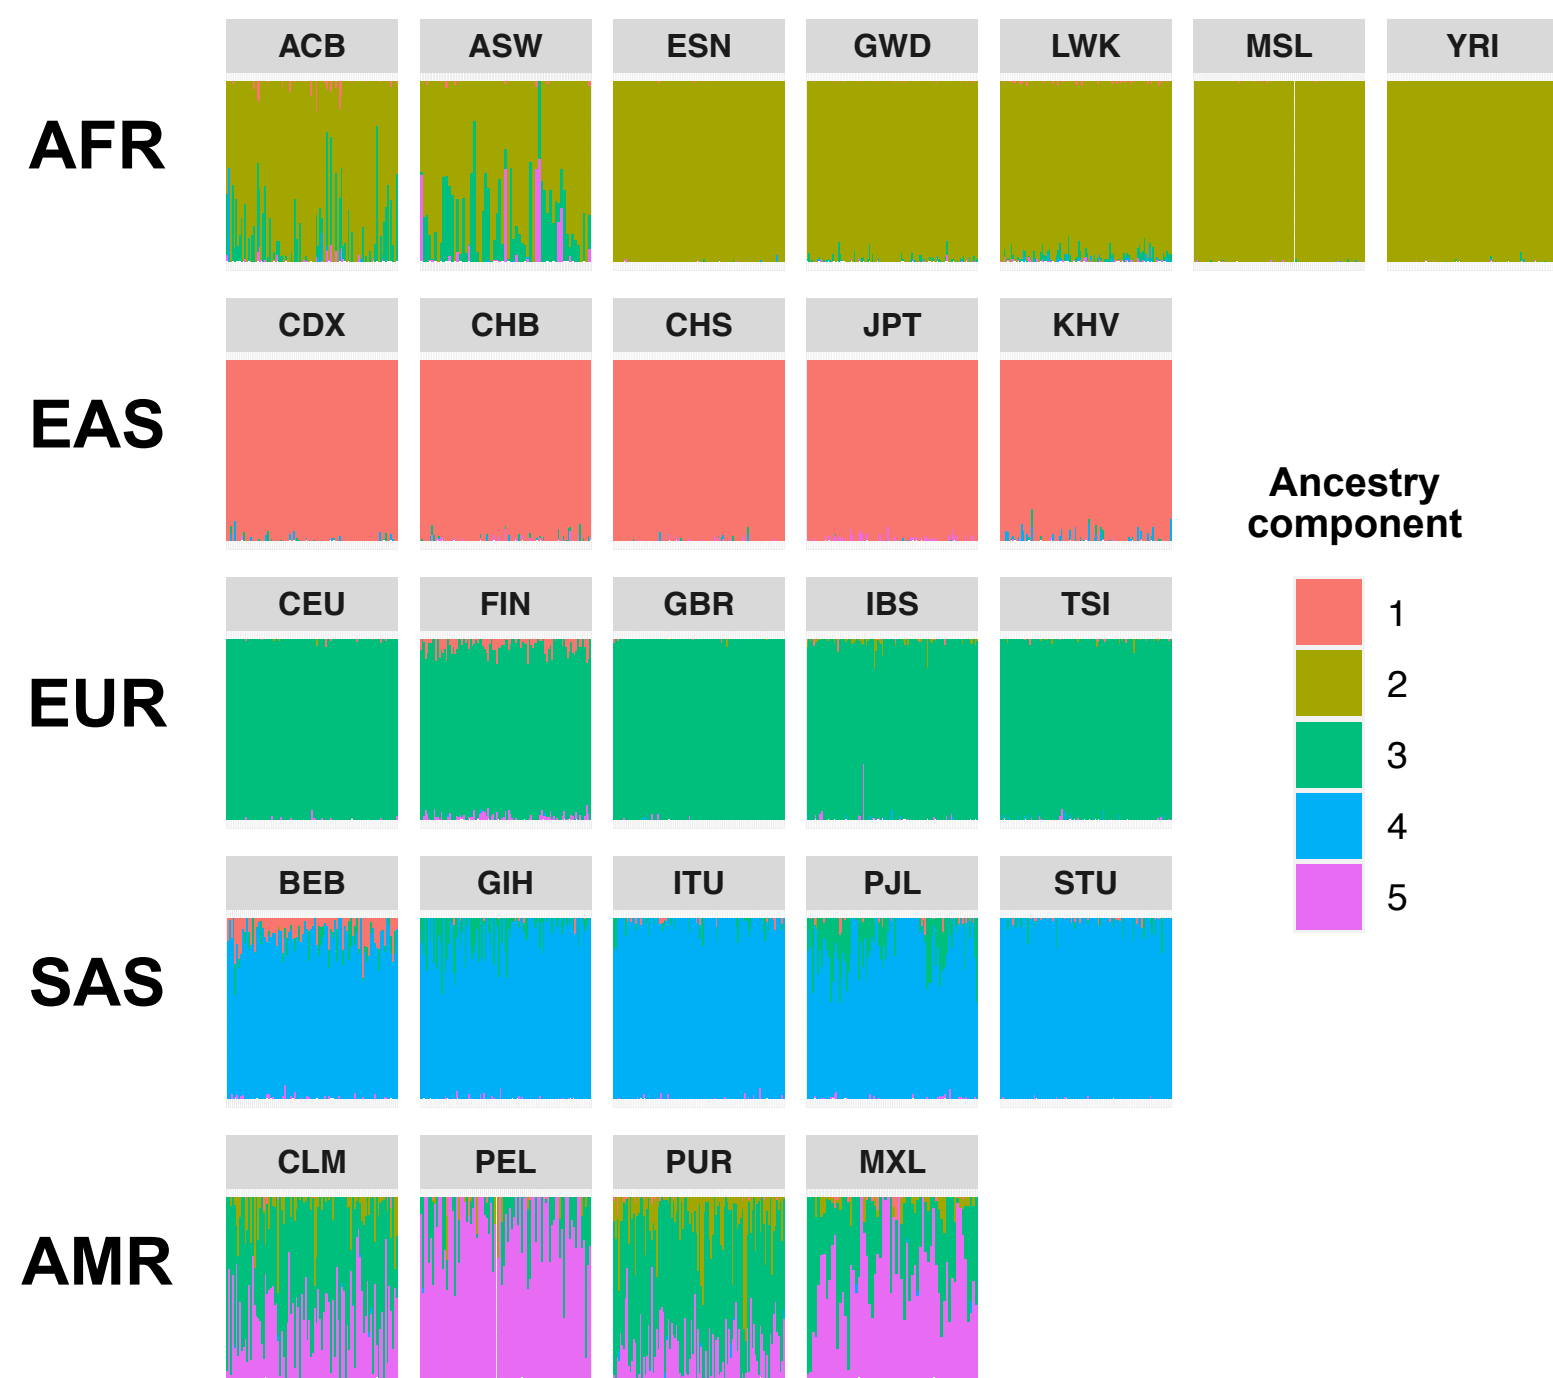

$k = 8$

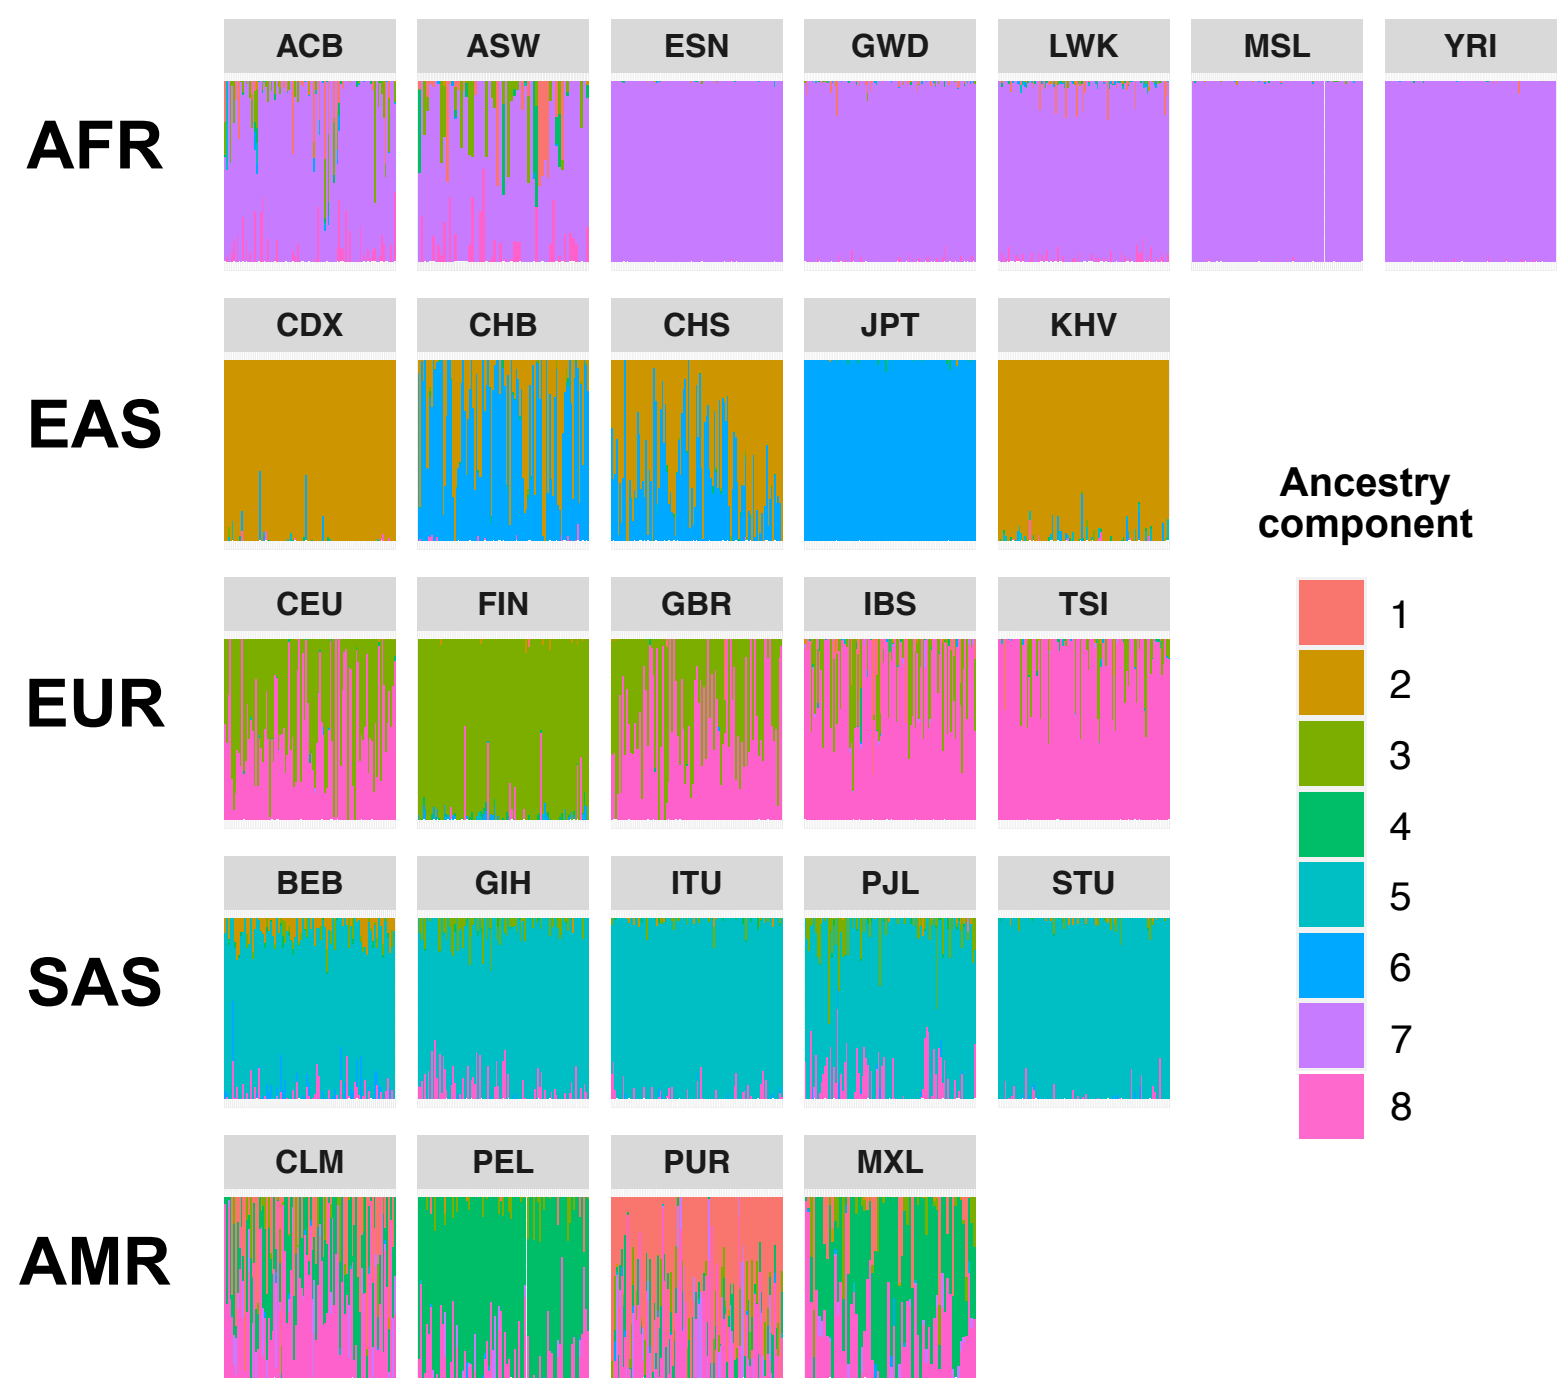

$k = 12$

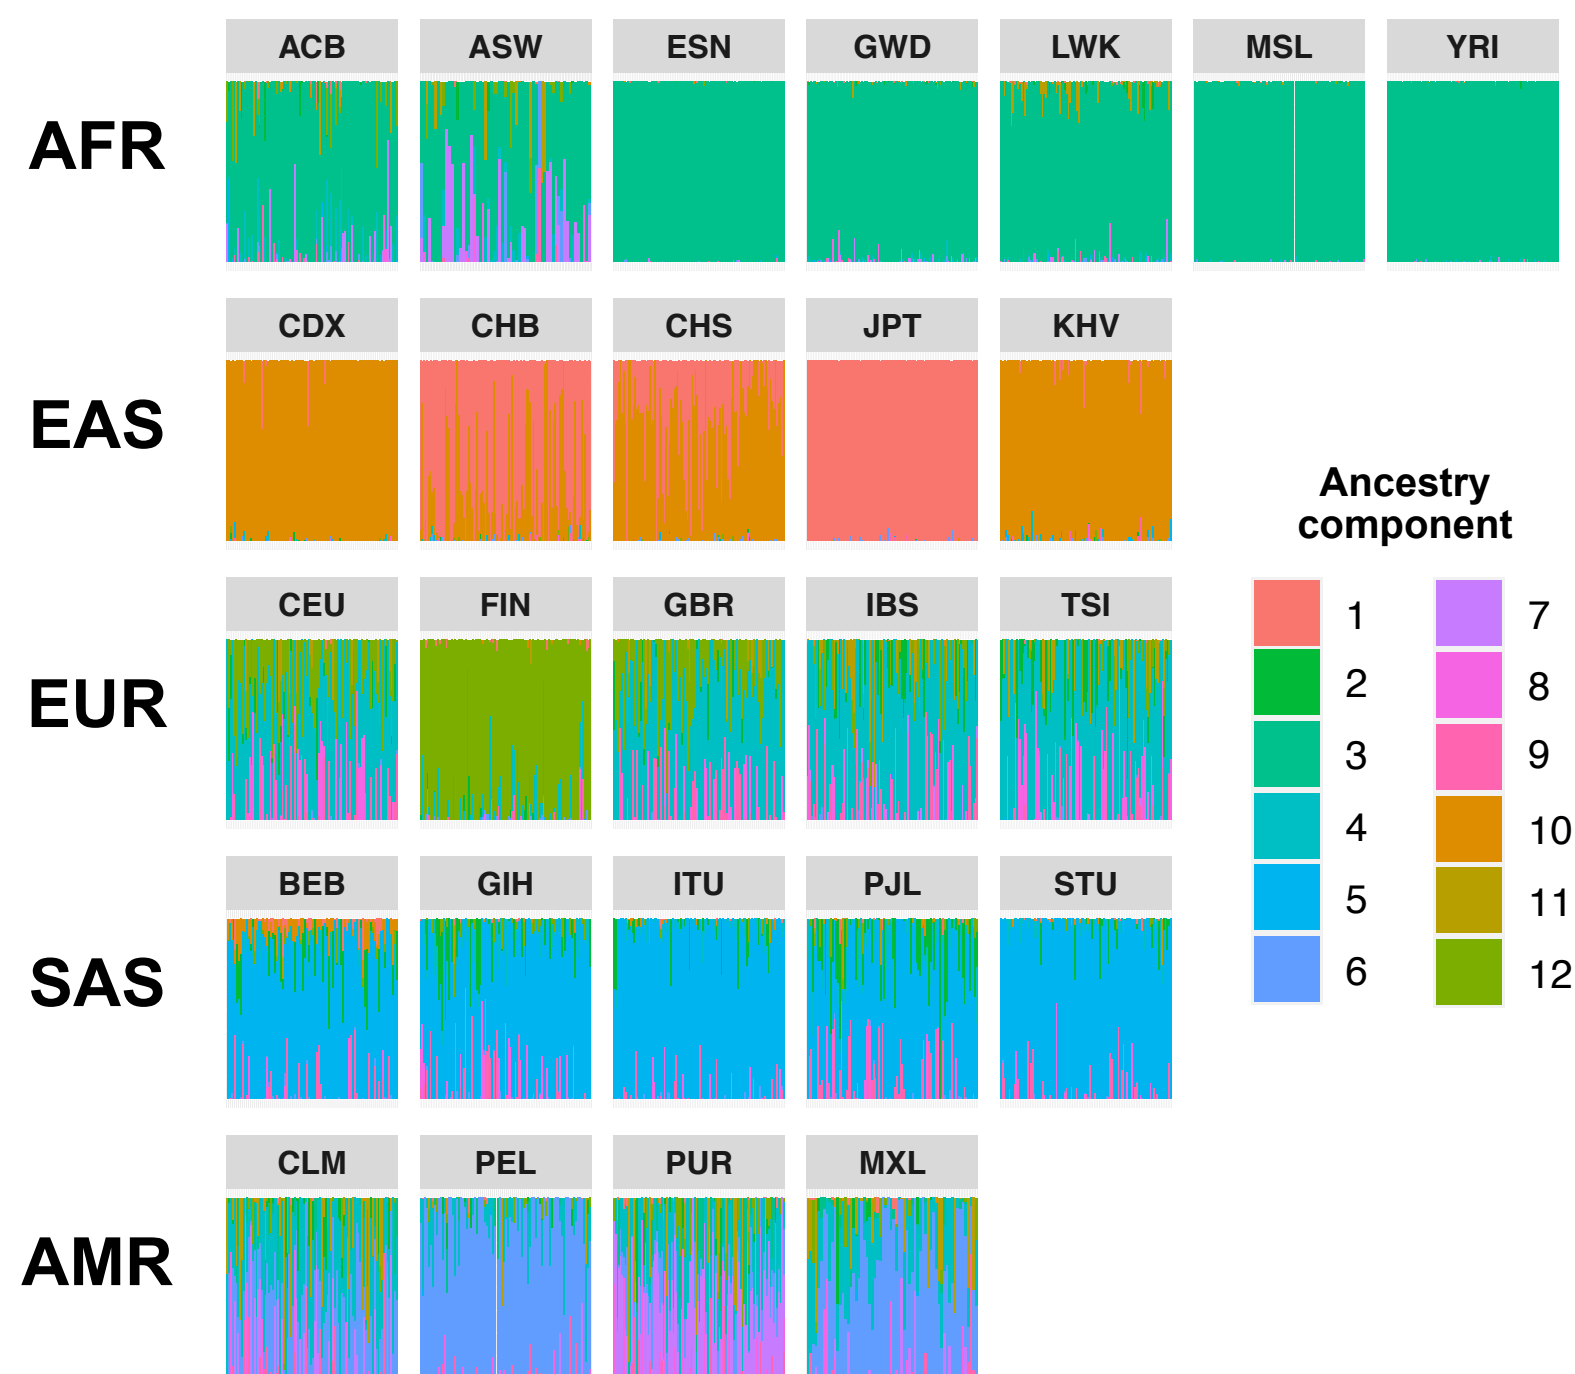

$k = 16$

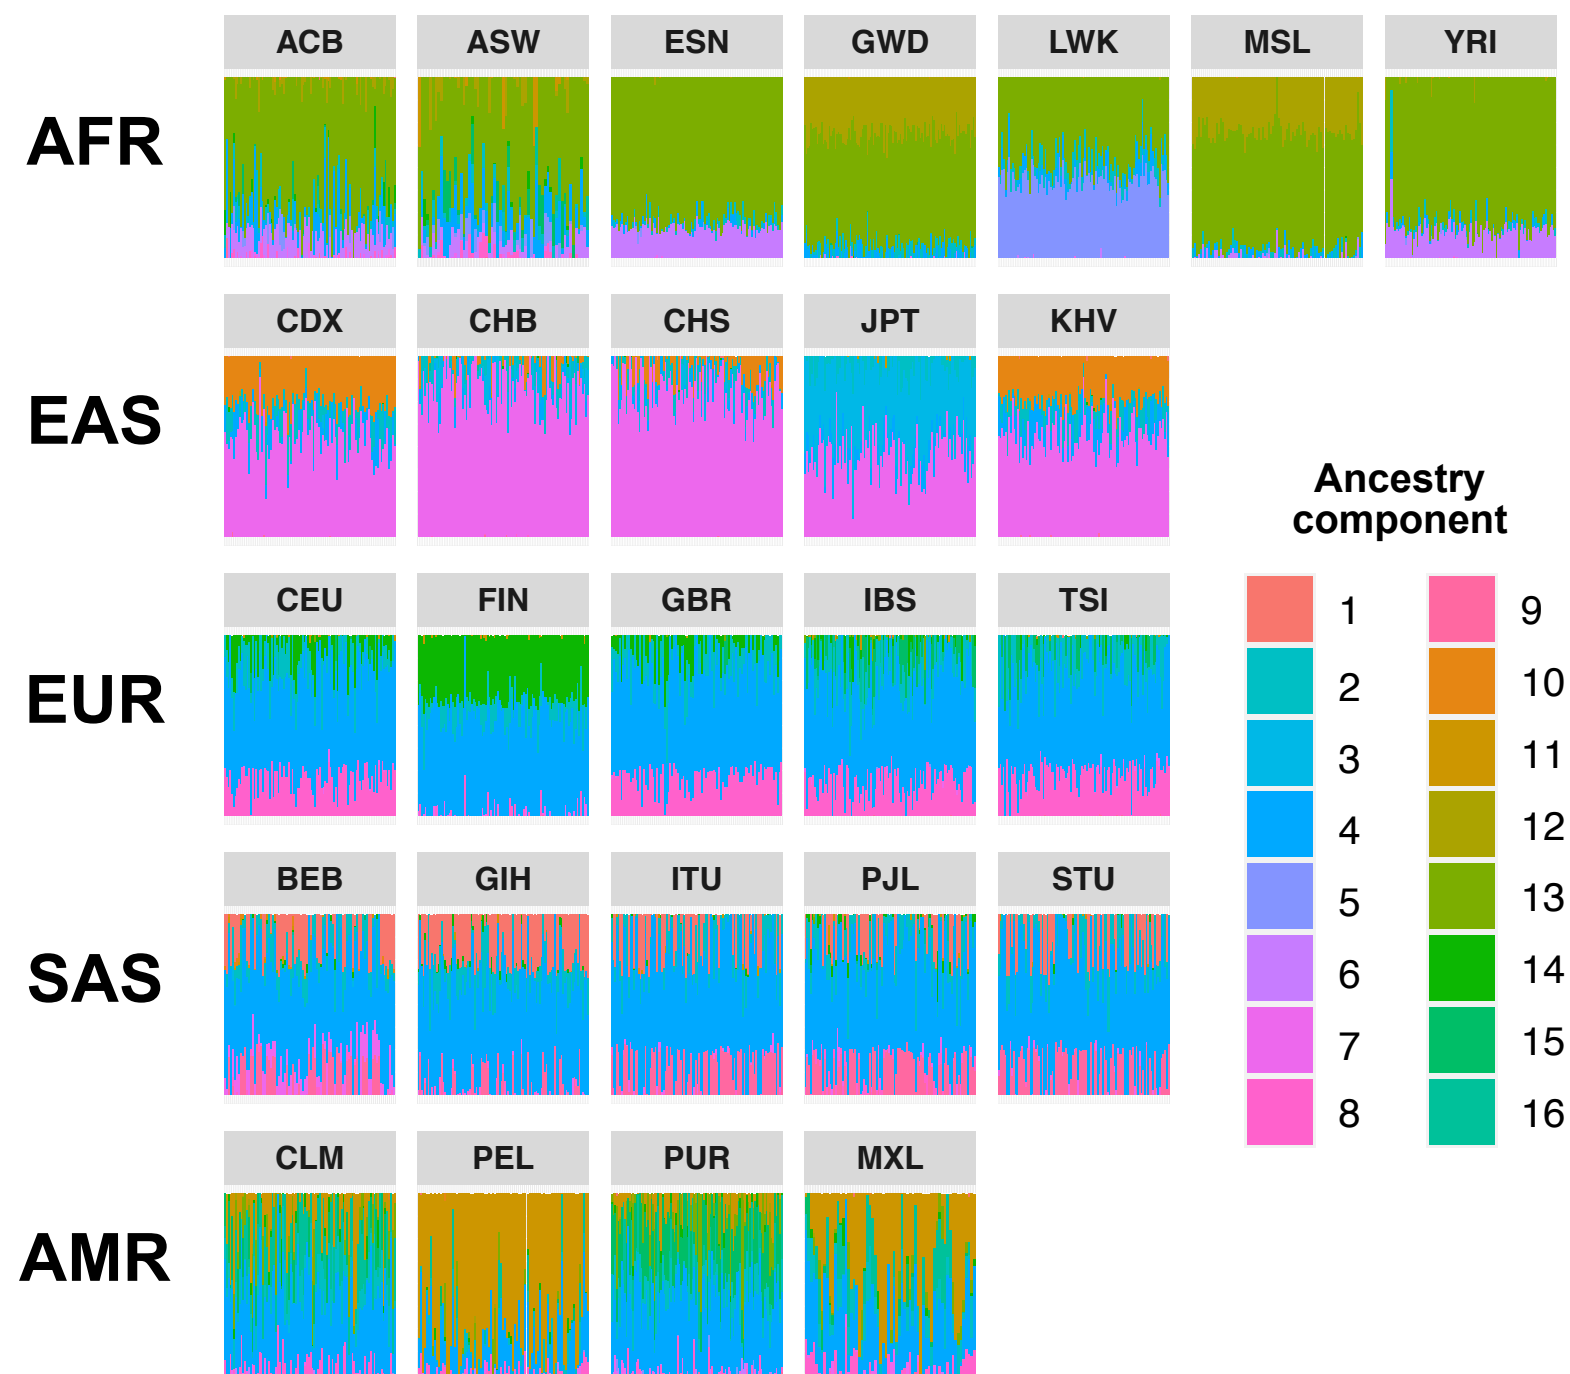

Supplement: supp [file elife_poa_e67615_Figure_3_figure_supplement_1.pdf › elife_poa_e67615_Figure_3_figure_supplement_1.pdf]

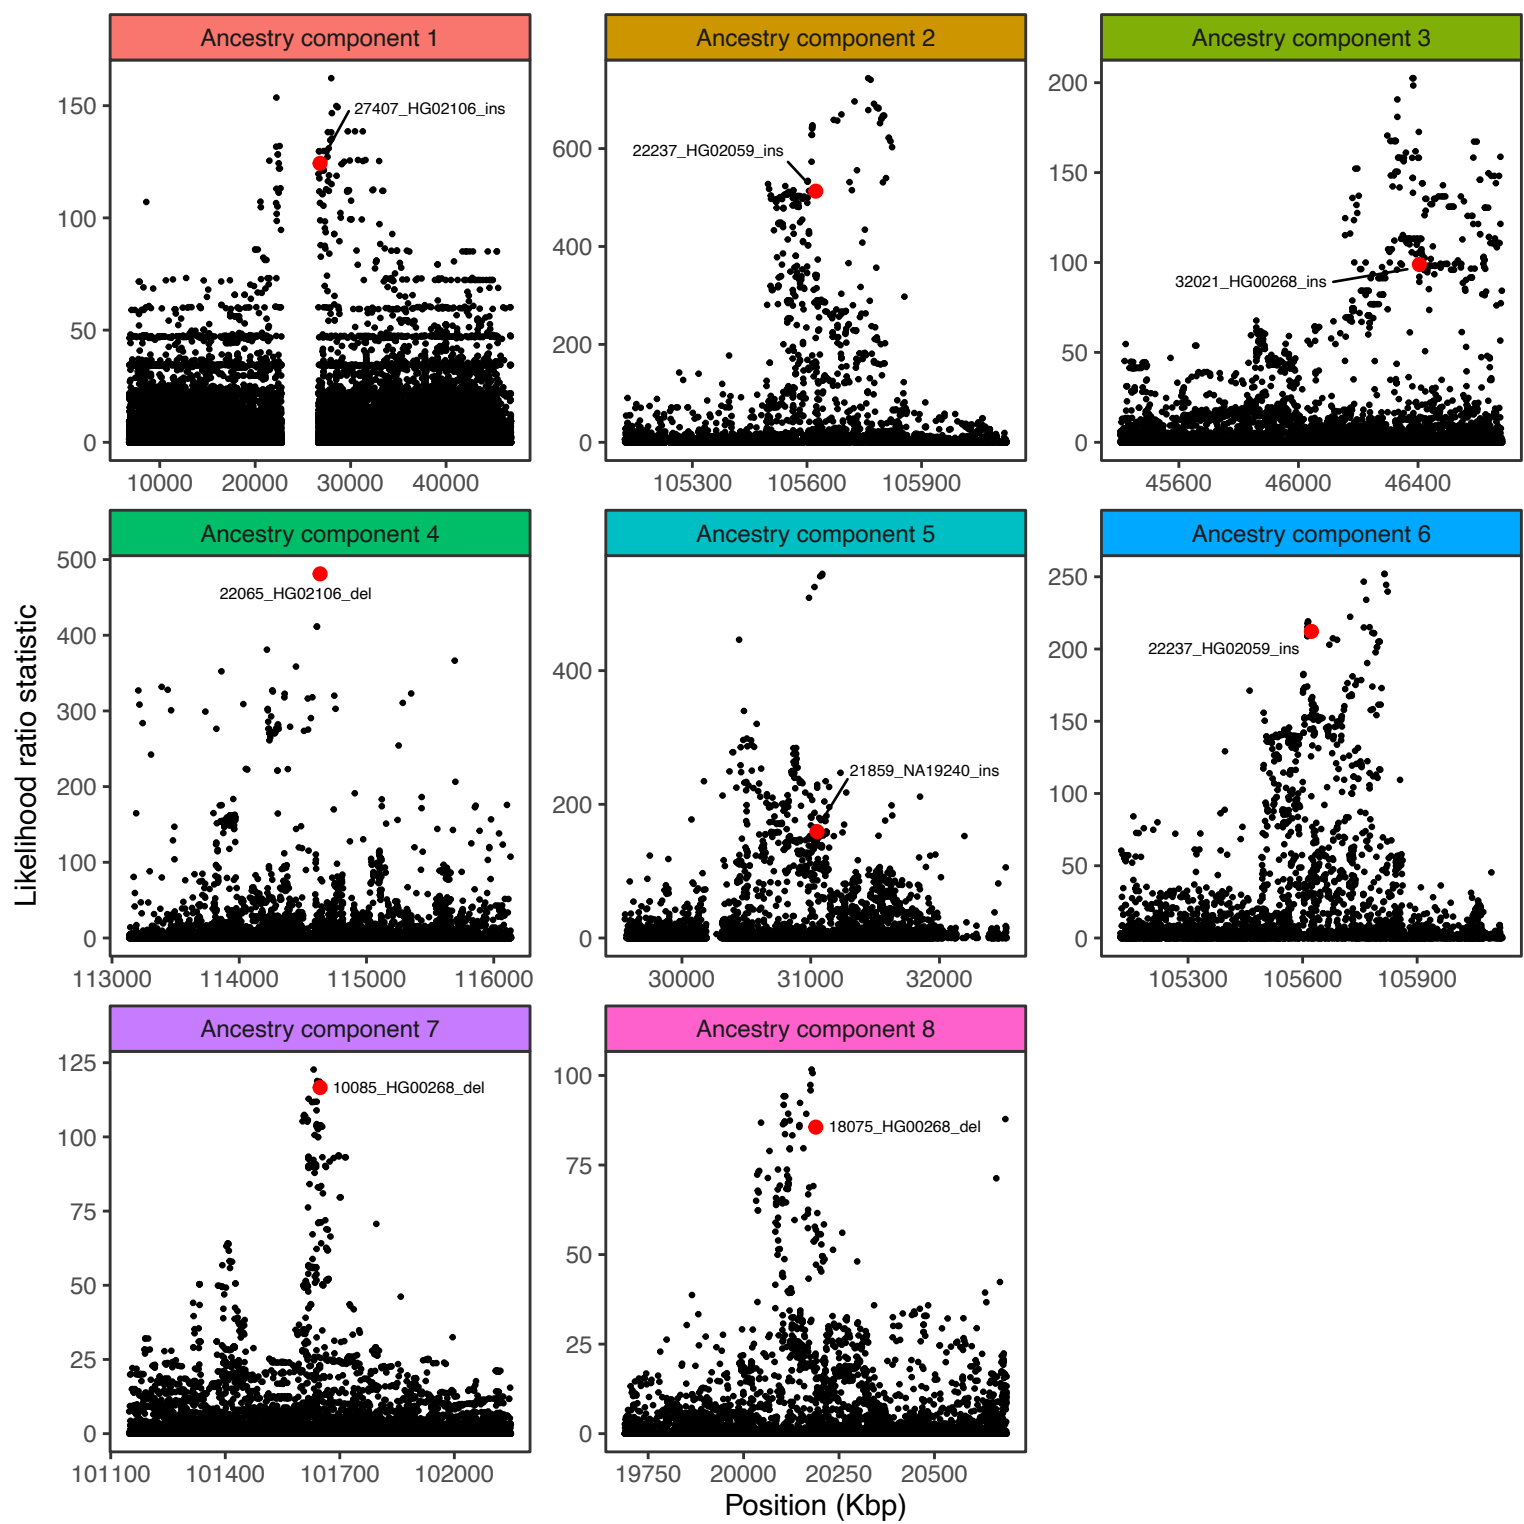

Supplement: supp [file elife_poa_e67615_Figure_3_figure_supplement_2.pdf › elife_poa_e67615_Figure_3_figure_supplement_2.pdf]

Likelihood ratio statistic

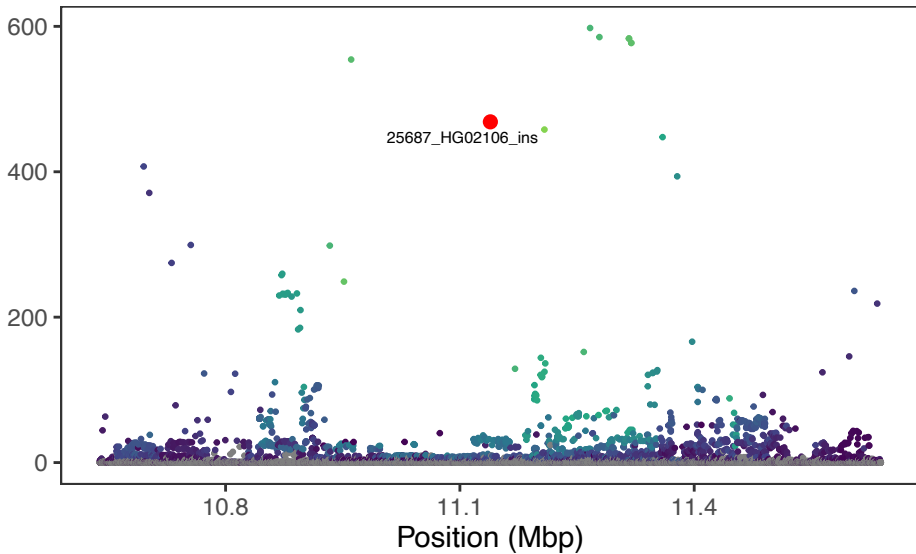

Maximum LD  
( $r^2$ )

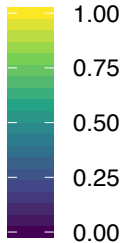

Supplement: supp [file elife_poa_e67615_Figure_3_figure_supplement_3.pdf › elife_poa_e67615_Figure_3_figure_supplement_3.pdf]

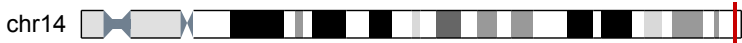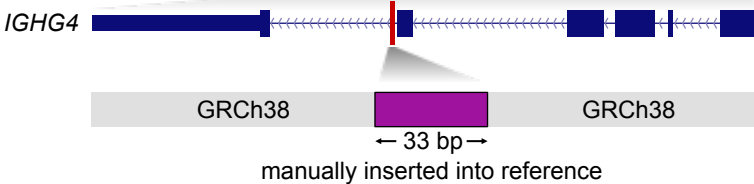

NA18951 homozygous REF/REF

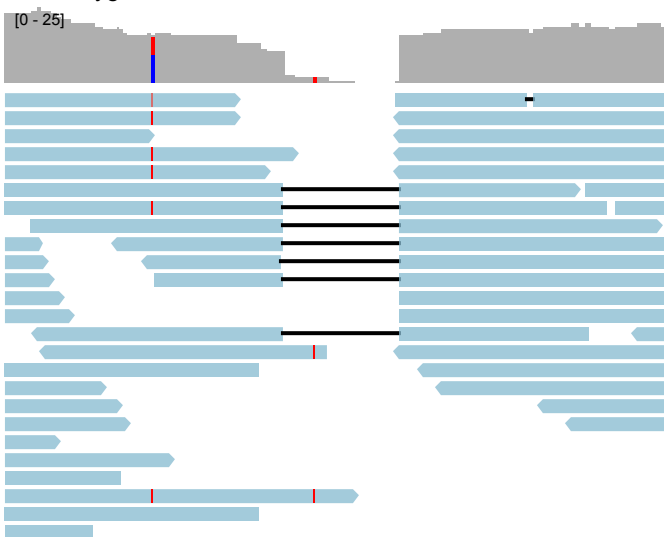

HG01815 heterozygous REF/INS

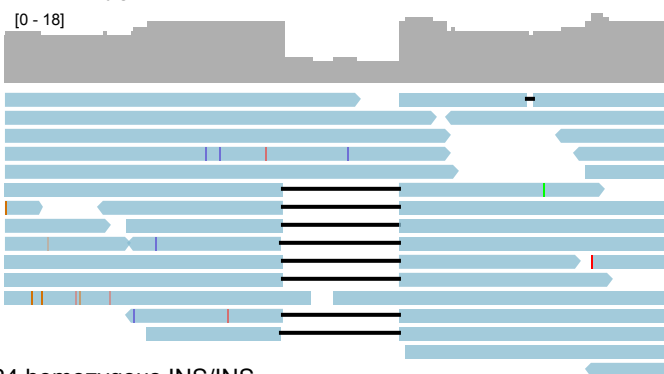

HG02384 homozygous INS/INS

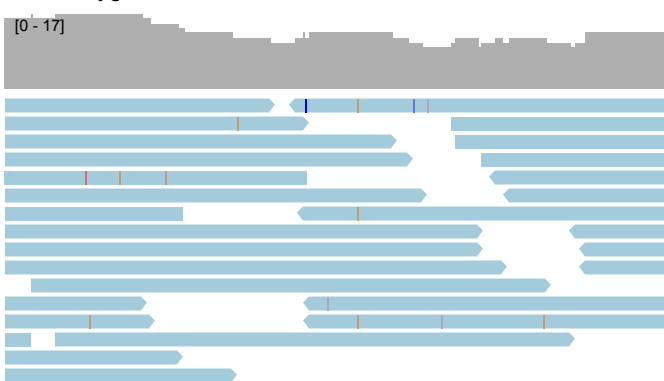

Supplement: supp [file elife_poa_e67615_Figure_4_figure_supplement_1.pdf › elife_poa_e67615_Figure_4_figure_supplement_1.pdf]

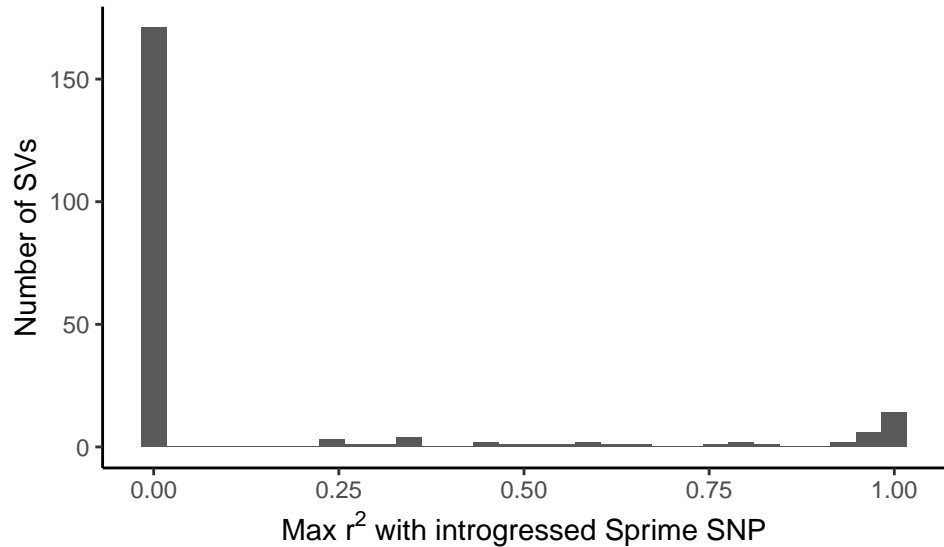

Supplement: supp [file elife_poa_e67615_Figure_4_figure_supplement_2.pdf › elife_poa_e67615_Figure_4_figure_supplement_2.pdf]

Population

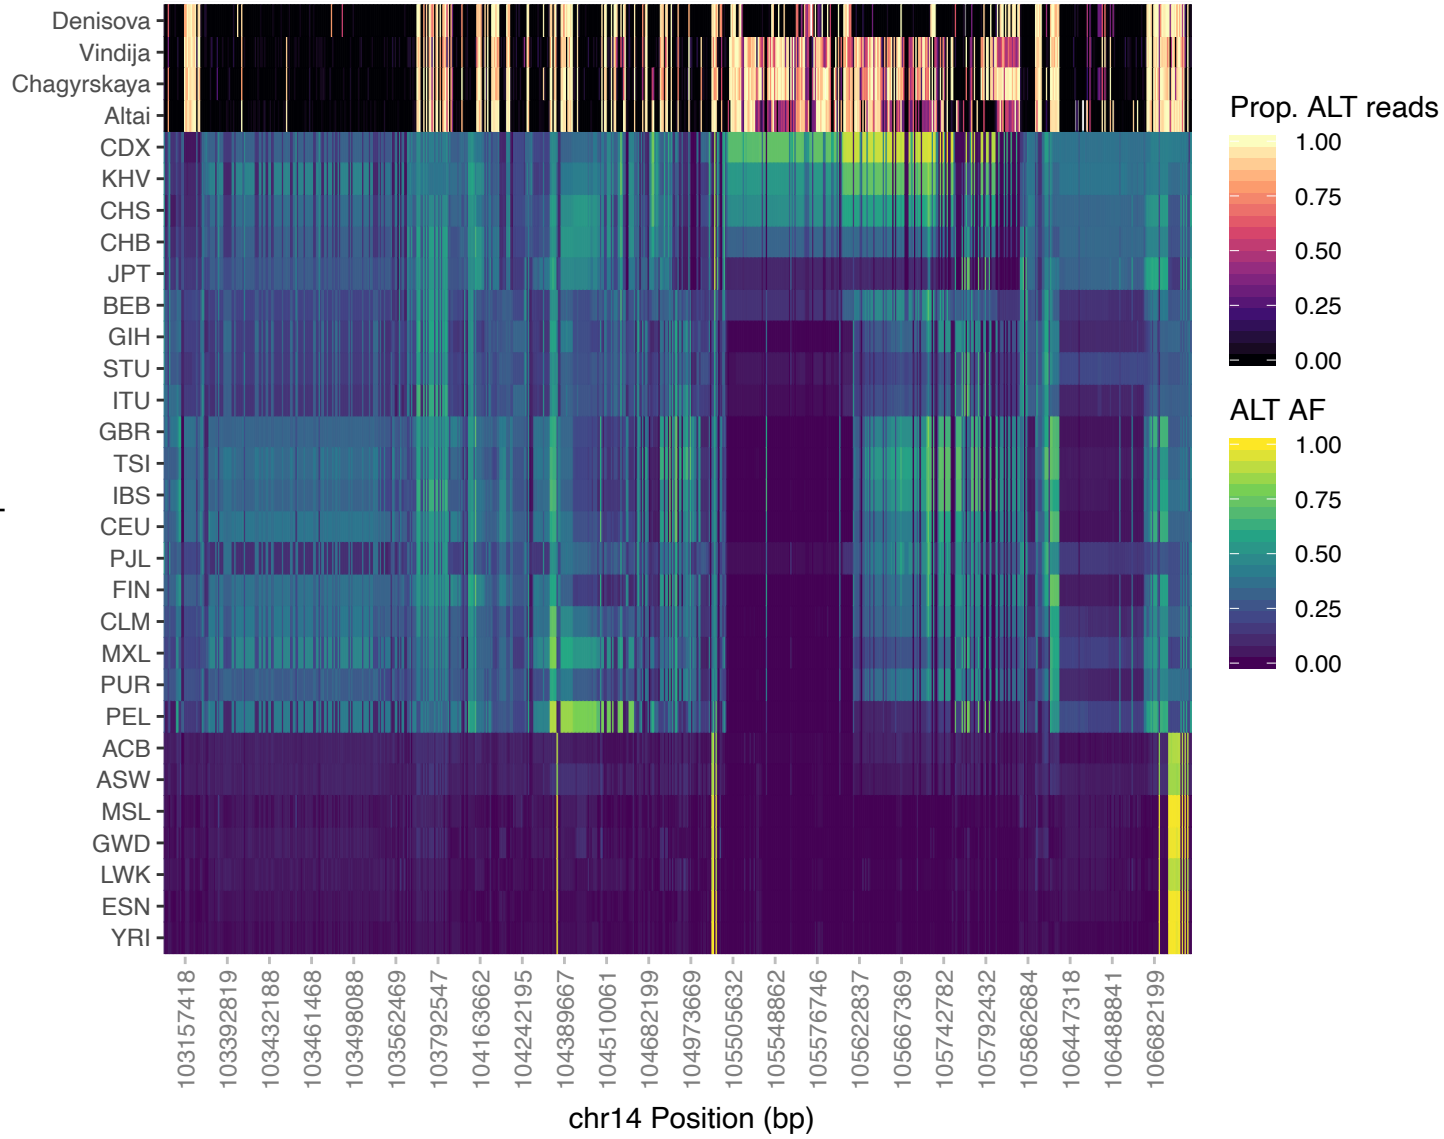

Supplement: supp [file elife_poa_e67615_Figure_4_figure_supplement_3.pdf › elife_poa_e67615_Figure_4_figure_supplement_3.pdf]

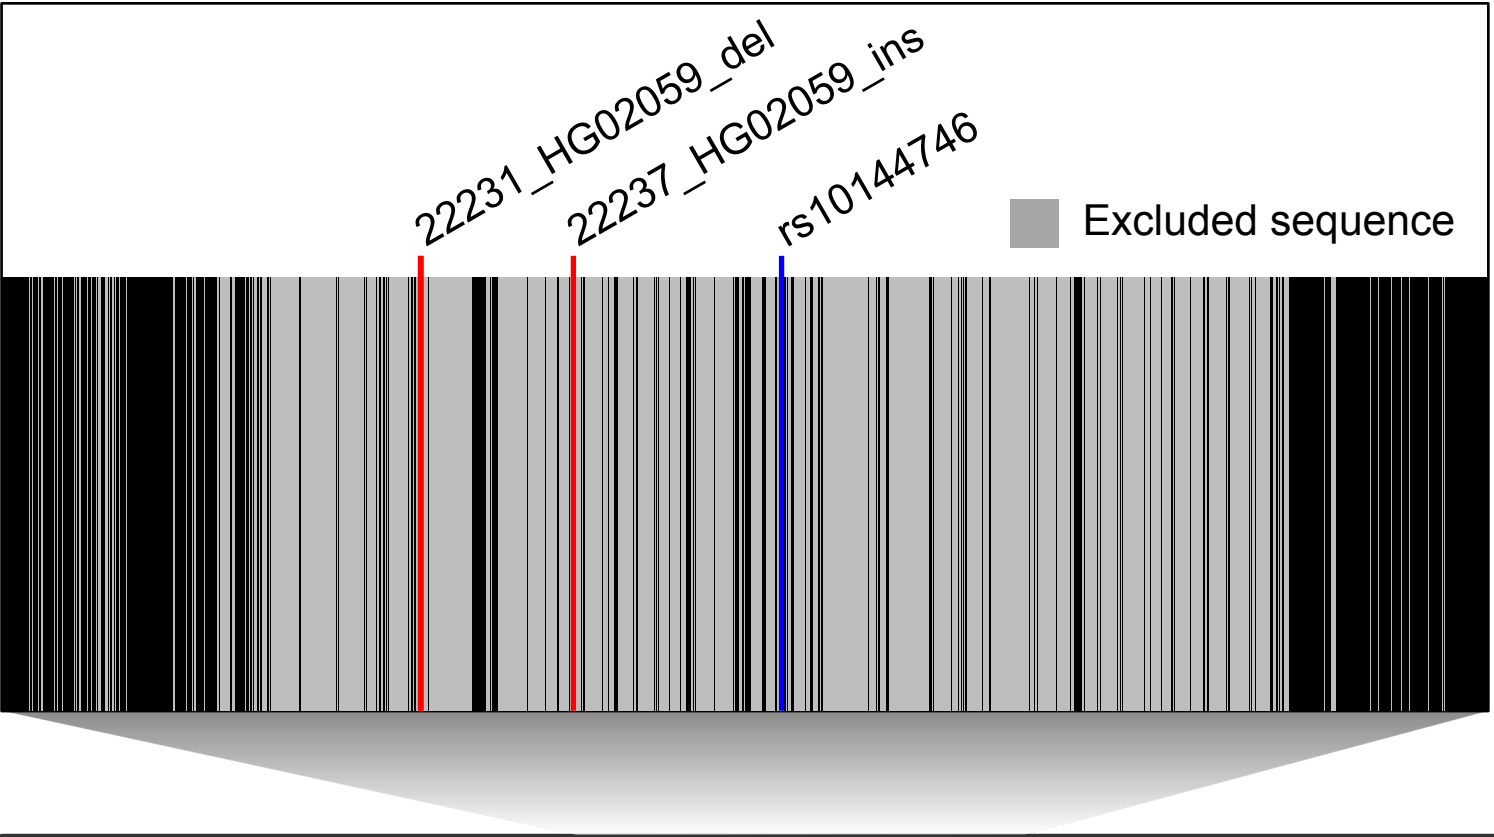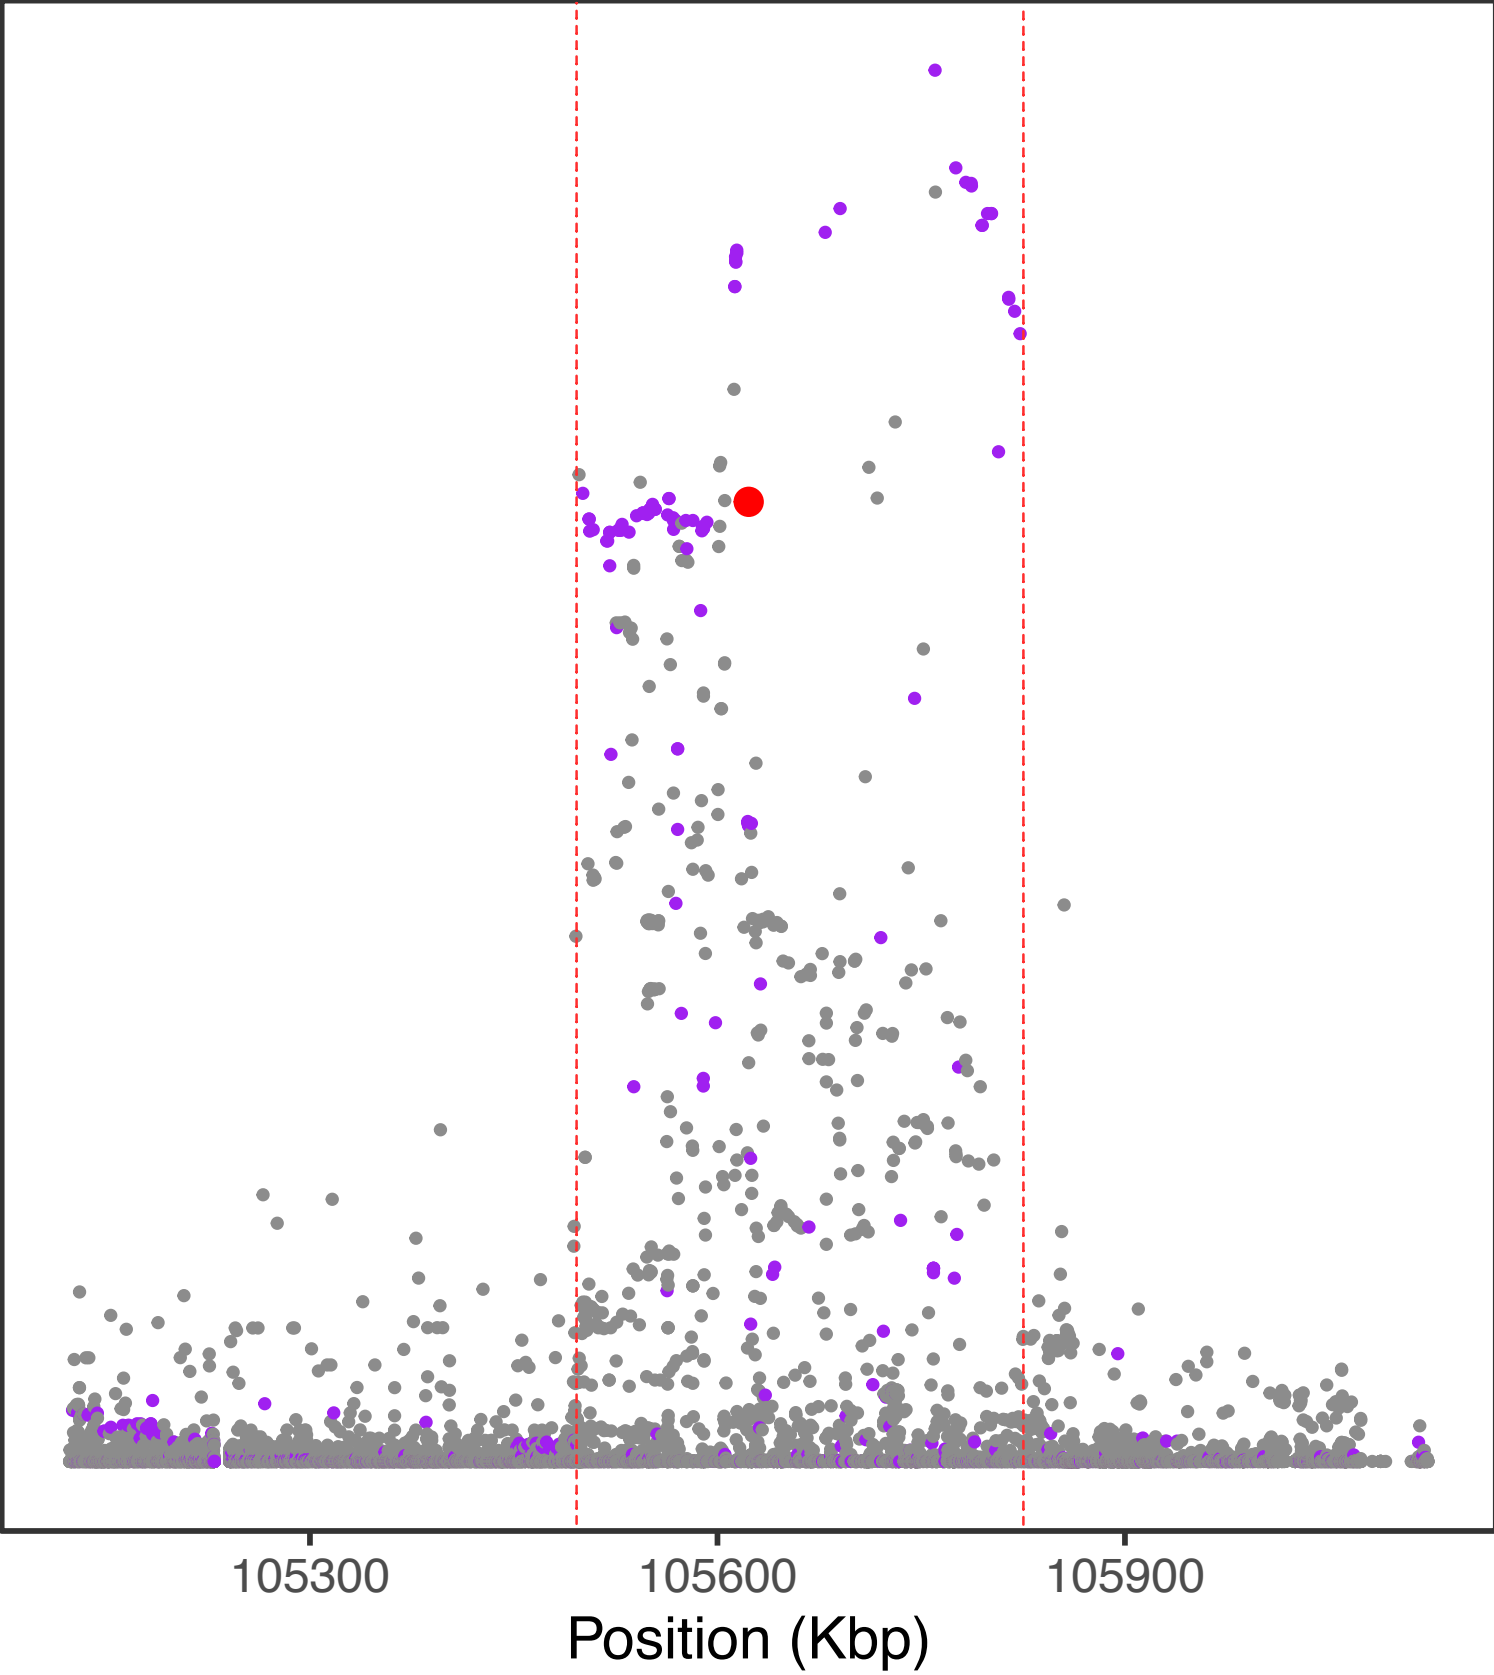

Supplement: supp [file elife_poa_e67615_Figure_4_figure_supplement_4.pdf › elife_poa_e67615_Figure_4_figure_supplement_4.pdf]

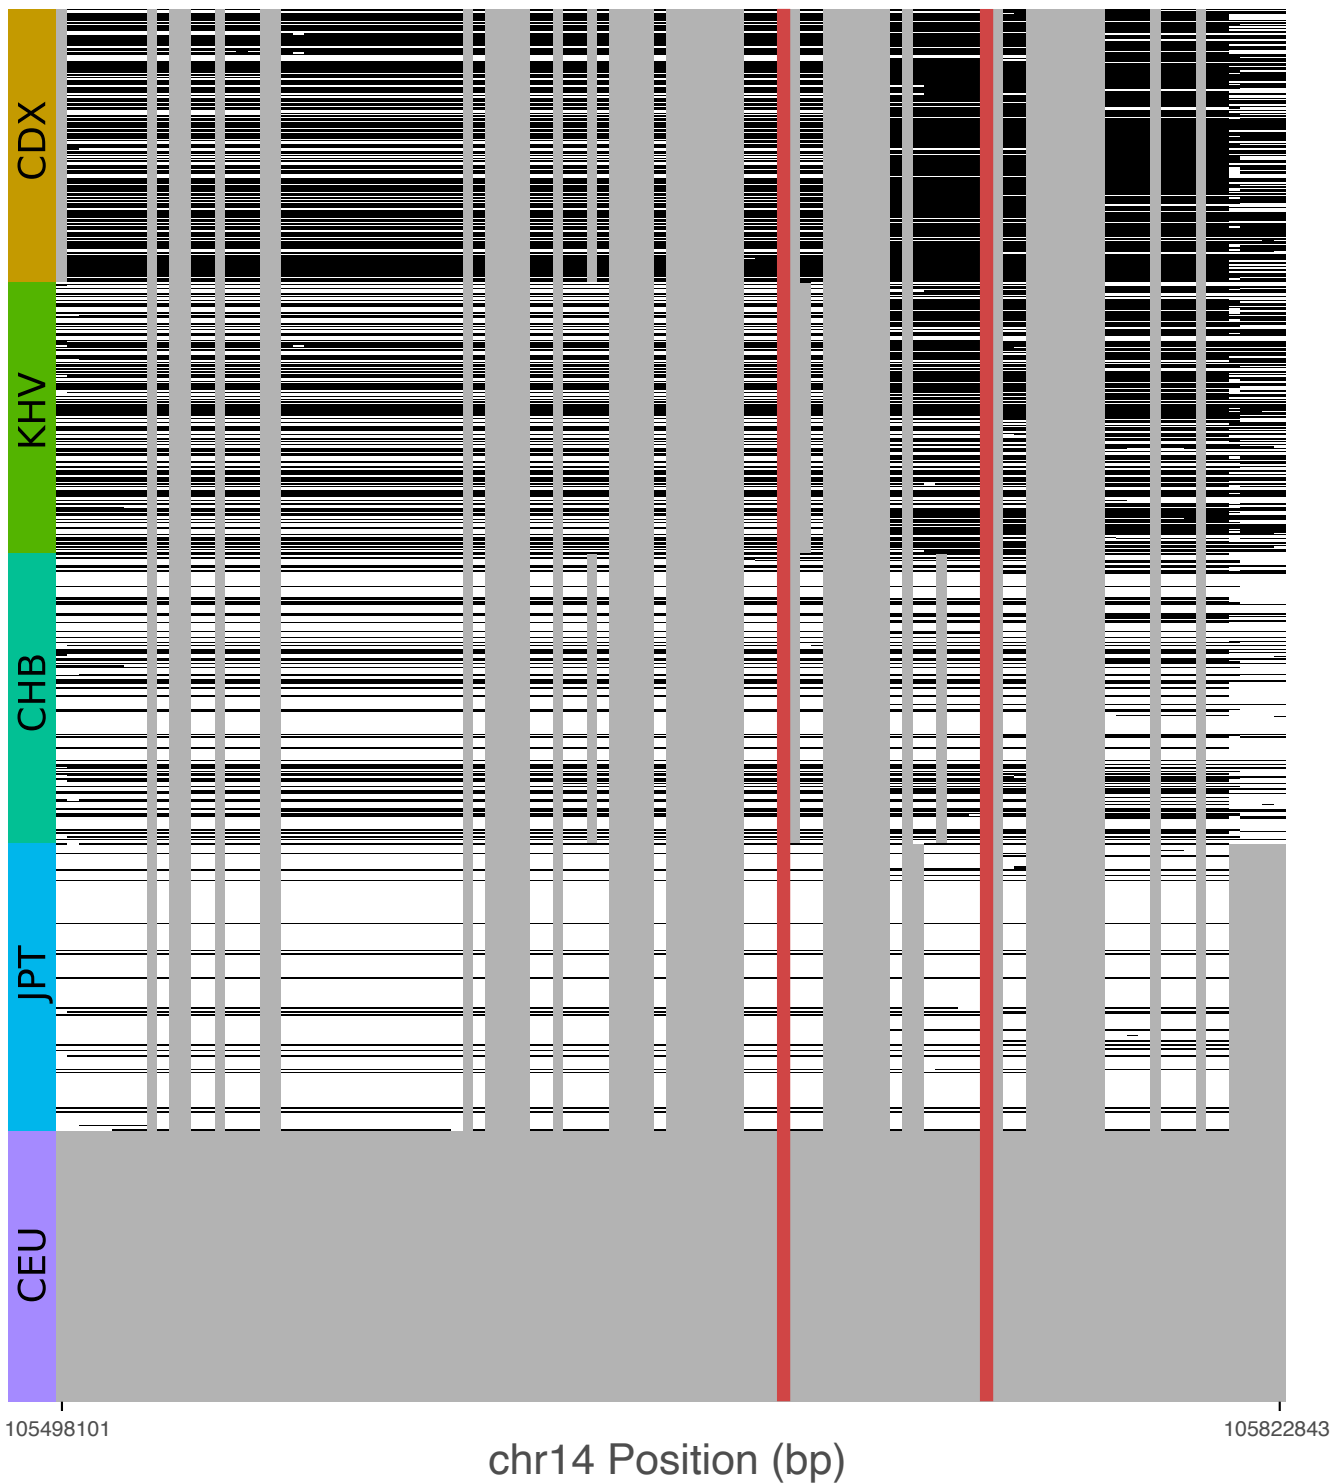

Supplement: supp [file elife_poa_e67615_Figure_4_figure_supplement_6.pdf › elife_poa_e67615_Figure_4_figure_supplement_6.pdf]

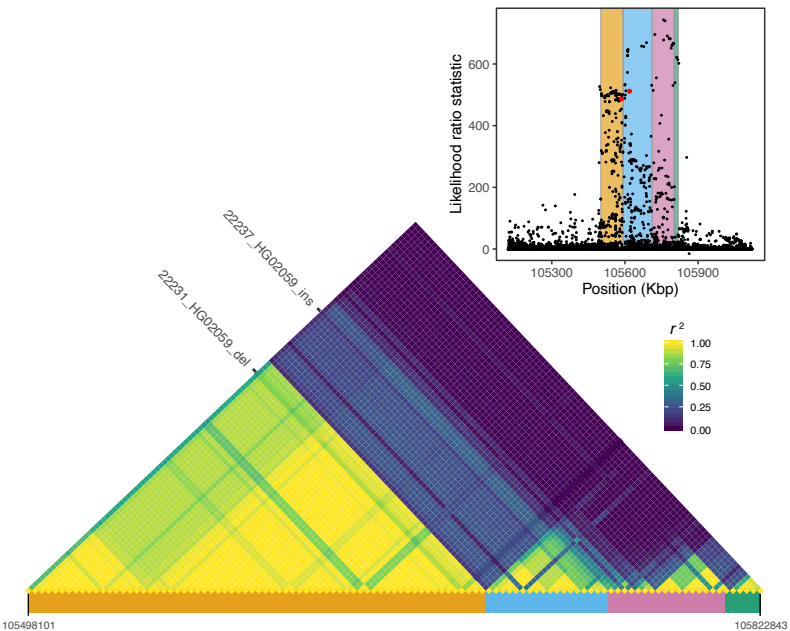

Supplement: supp [file elife_poa_e67615_Figure_4_figure_supplement_7.pdf › elife_poa_e67615_Figure_4_figure_supplement_7.pdf]

HGDP

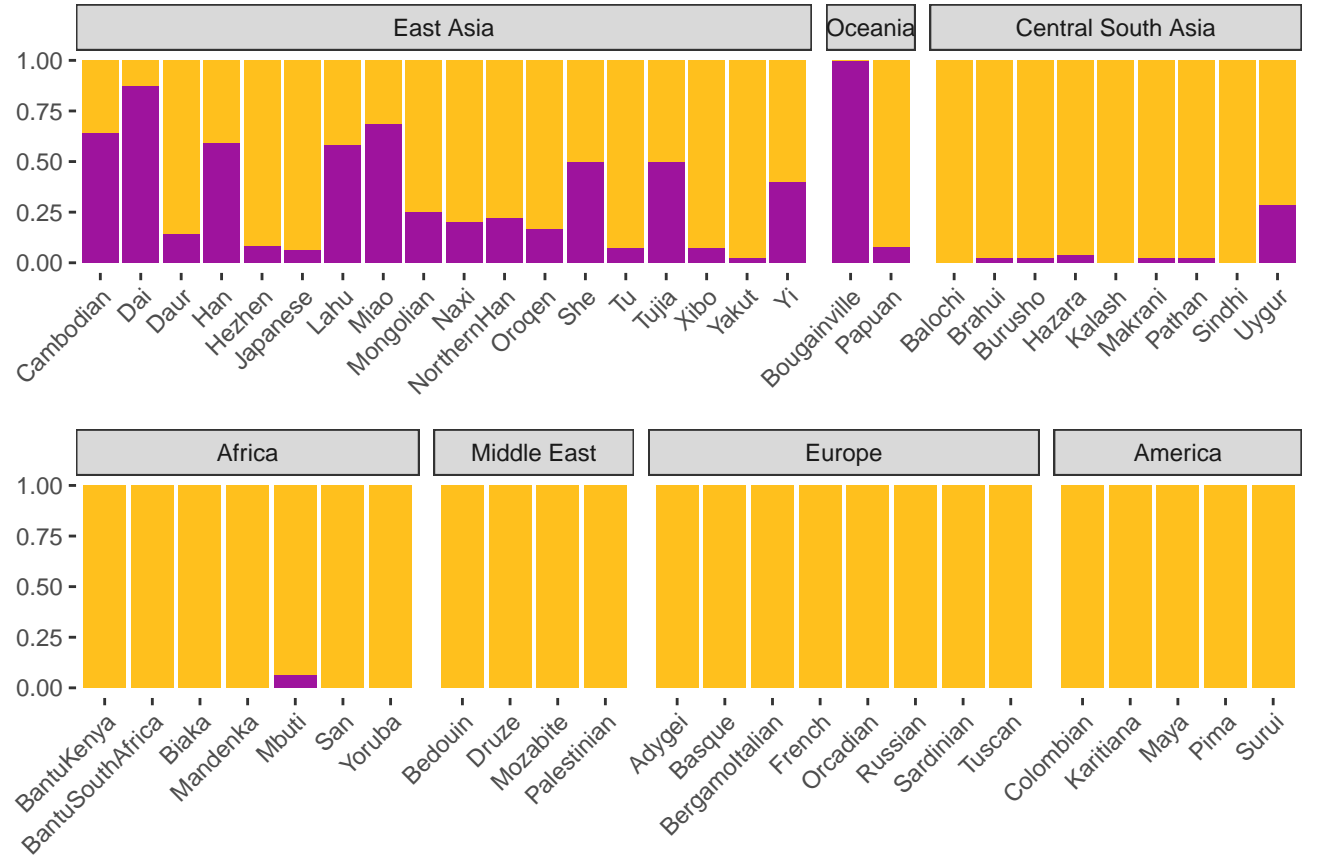

SGDP

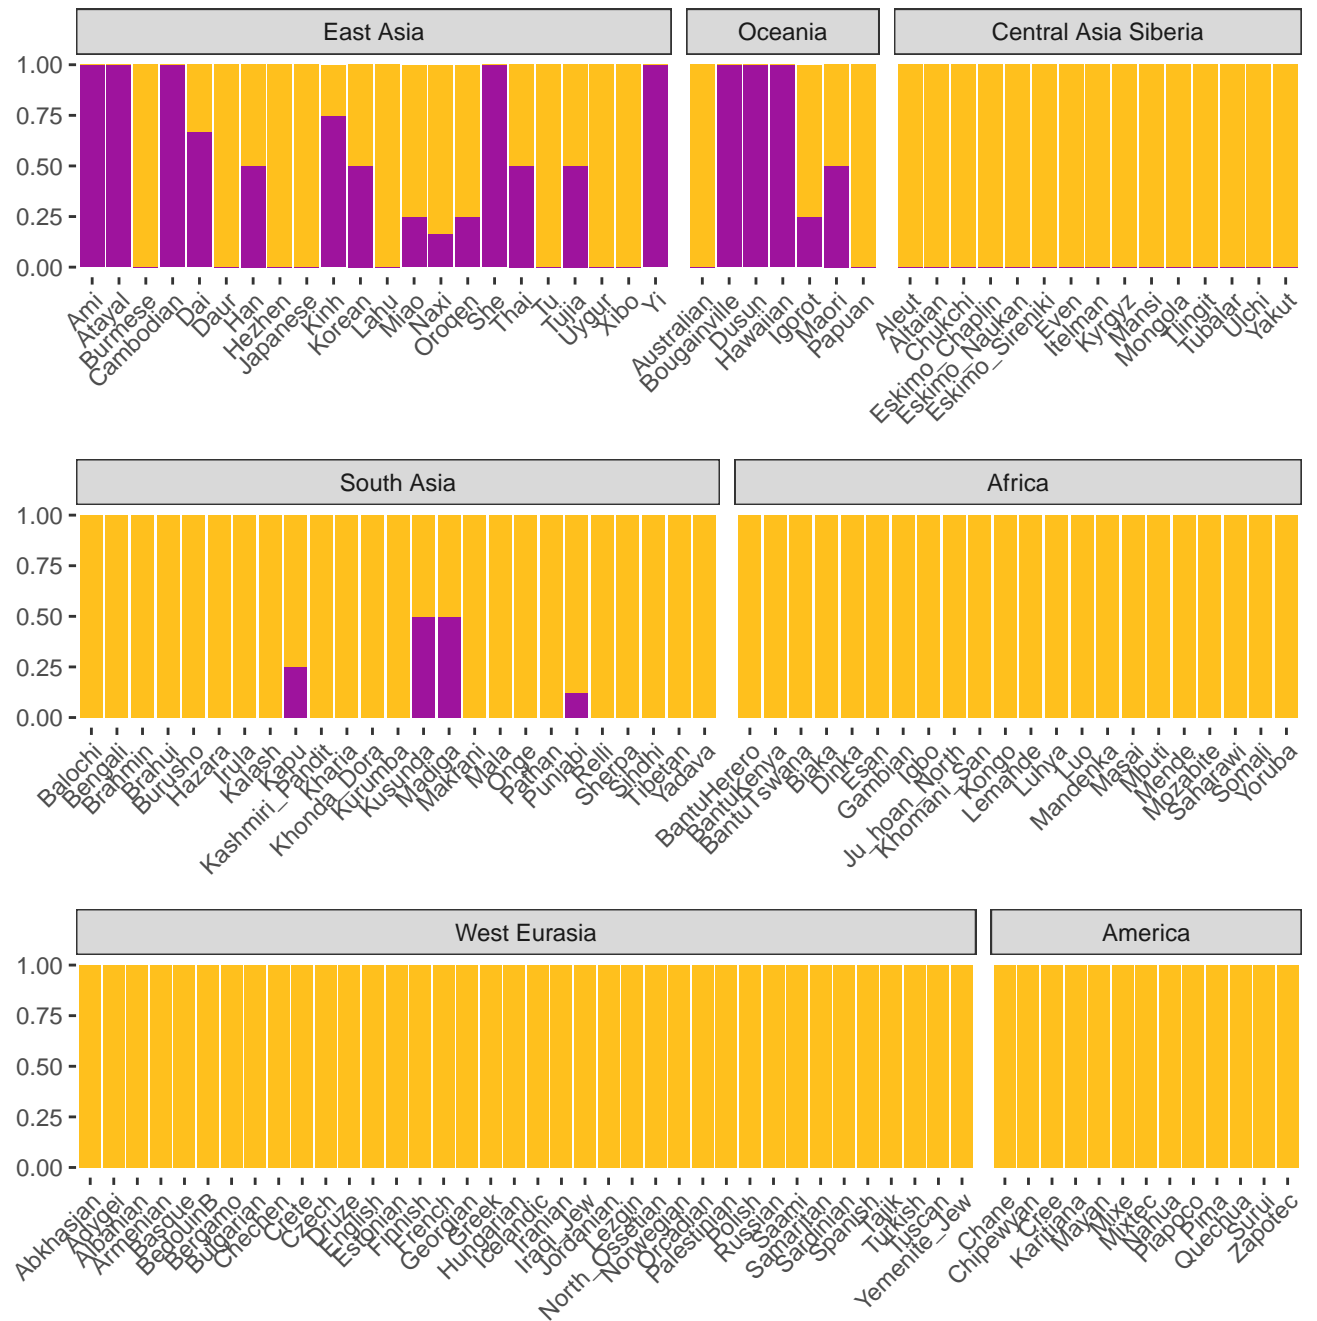

Allele: REF ALT

Supplement: supp [file elife_poa_e67615_Figure_4_figure_supplement_8.pdf › elife_poa_e67615_Figure_4_figure_supplement_8.pdf]

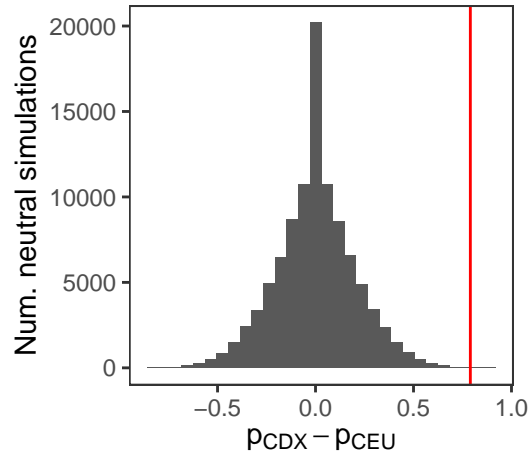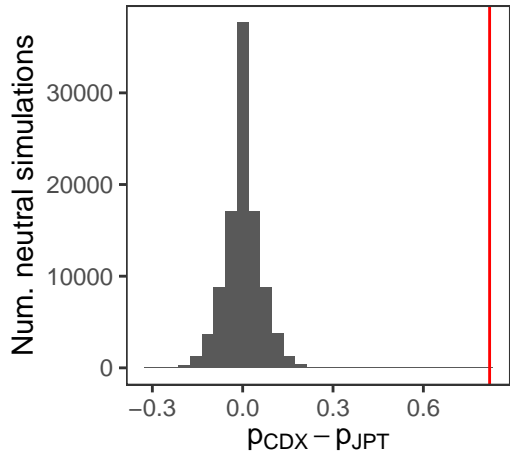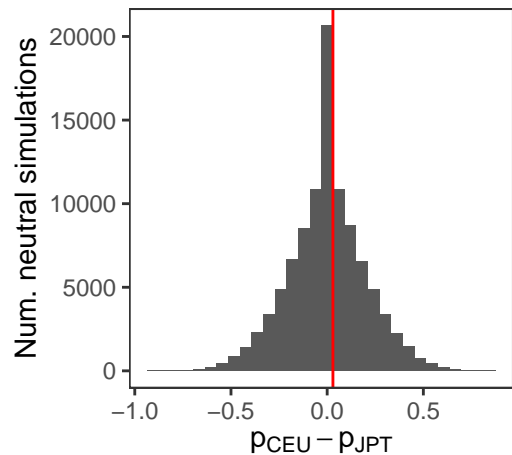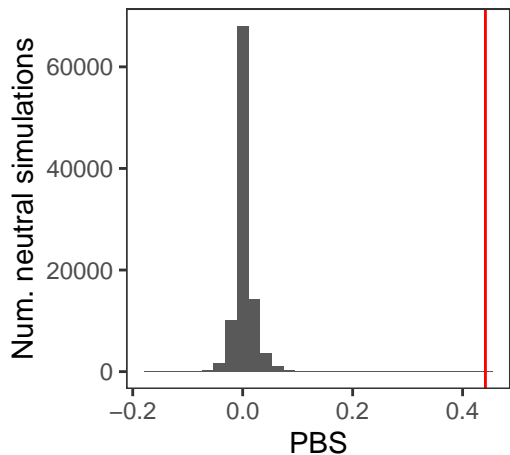

Supplement: supp [file elife_poa_e67615_Figure_5_figure_supplement_1.pdf › elife_poa_e67615_Figure_5_figure_supplement_1.pdf]

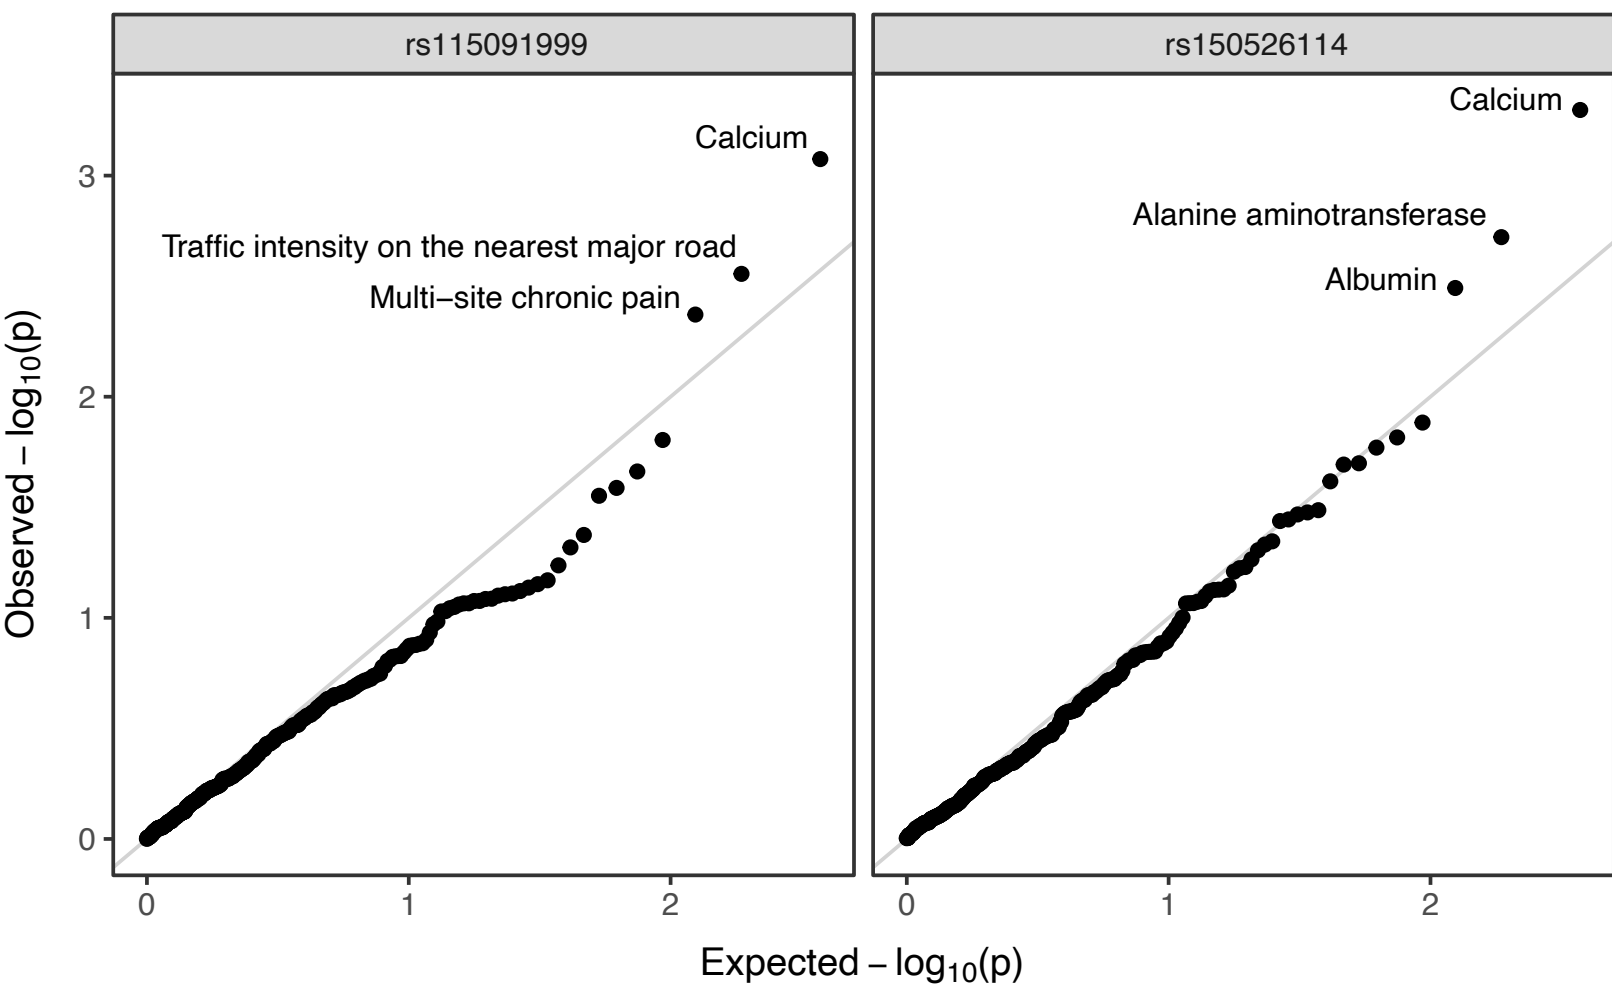

Supplement: supp [file elife_poa_e67615_Figure_5_figure_supplement_2.pdf › elife_poa_e67615_Figure_5_figure_supplement_2.pdf]
